# Supplementary material for: Local field potentials reflect cortical population dynamics in a region-specific and frequency-dependent manner
Source: eLife journal article supplement (doi:10.7554/elife.73155), 2022-08-15
Supplement: supp [file elife-73155-supp-v1.zip]

Archive with 14 entries (14 files):
- elife_poa_e73155_Transparent_Reporting_File.pdf
- elife_poa_e73155_Figure_3_figure_supplement_1.tif
- elife_poa_e73155_Figure_3_figure_supplement_2.tif
- elife_poa_e73155_Figure_3_figure_supplement_3.tif
- elife_poa_e73155_Figure_3_figure_supplement_4.tif
- elife_poa_e73155_Figure_3_figure_supplement_5.tif
- elife_poa_e73155_Figure_3_figure_supplement_6.tif
- elife_poa_e73155_Figure_4_figure_supplement_1.tif
- elife_poa_e73155_Figure_5_figure_supplement_1.tif
- elife_poa_e73155_Figure_6_figure_supplement_1.tif
- elife_poa_e73155_Figure_6_figure_supplement_2.tif
- elife_poa_e73155_Figure_7_figure_supplement_1.tif
- elife_poa_e73155_Figure_7_figure_supplement_2.tif
- elife_poa_e73155_Figure_8_figure_supplement_1.tif
