# Supplementary figures and images for: Local field potentials reflect cortical population dynamics in a region-specific and frequency-dependent manner
Source: eLife journal article supplement (doi:10.7554/elife.73155), 2022-08-15

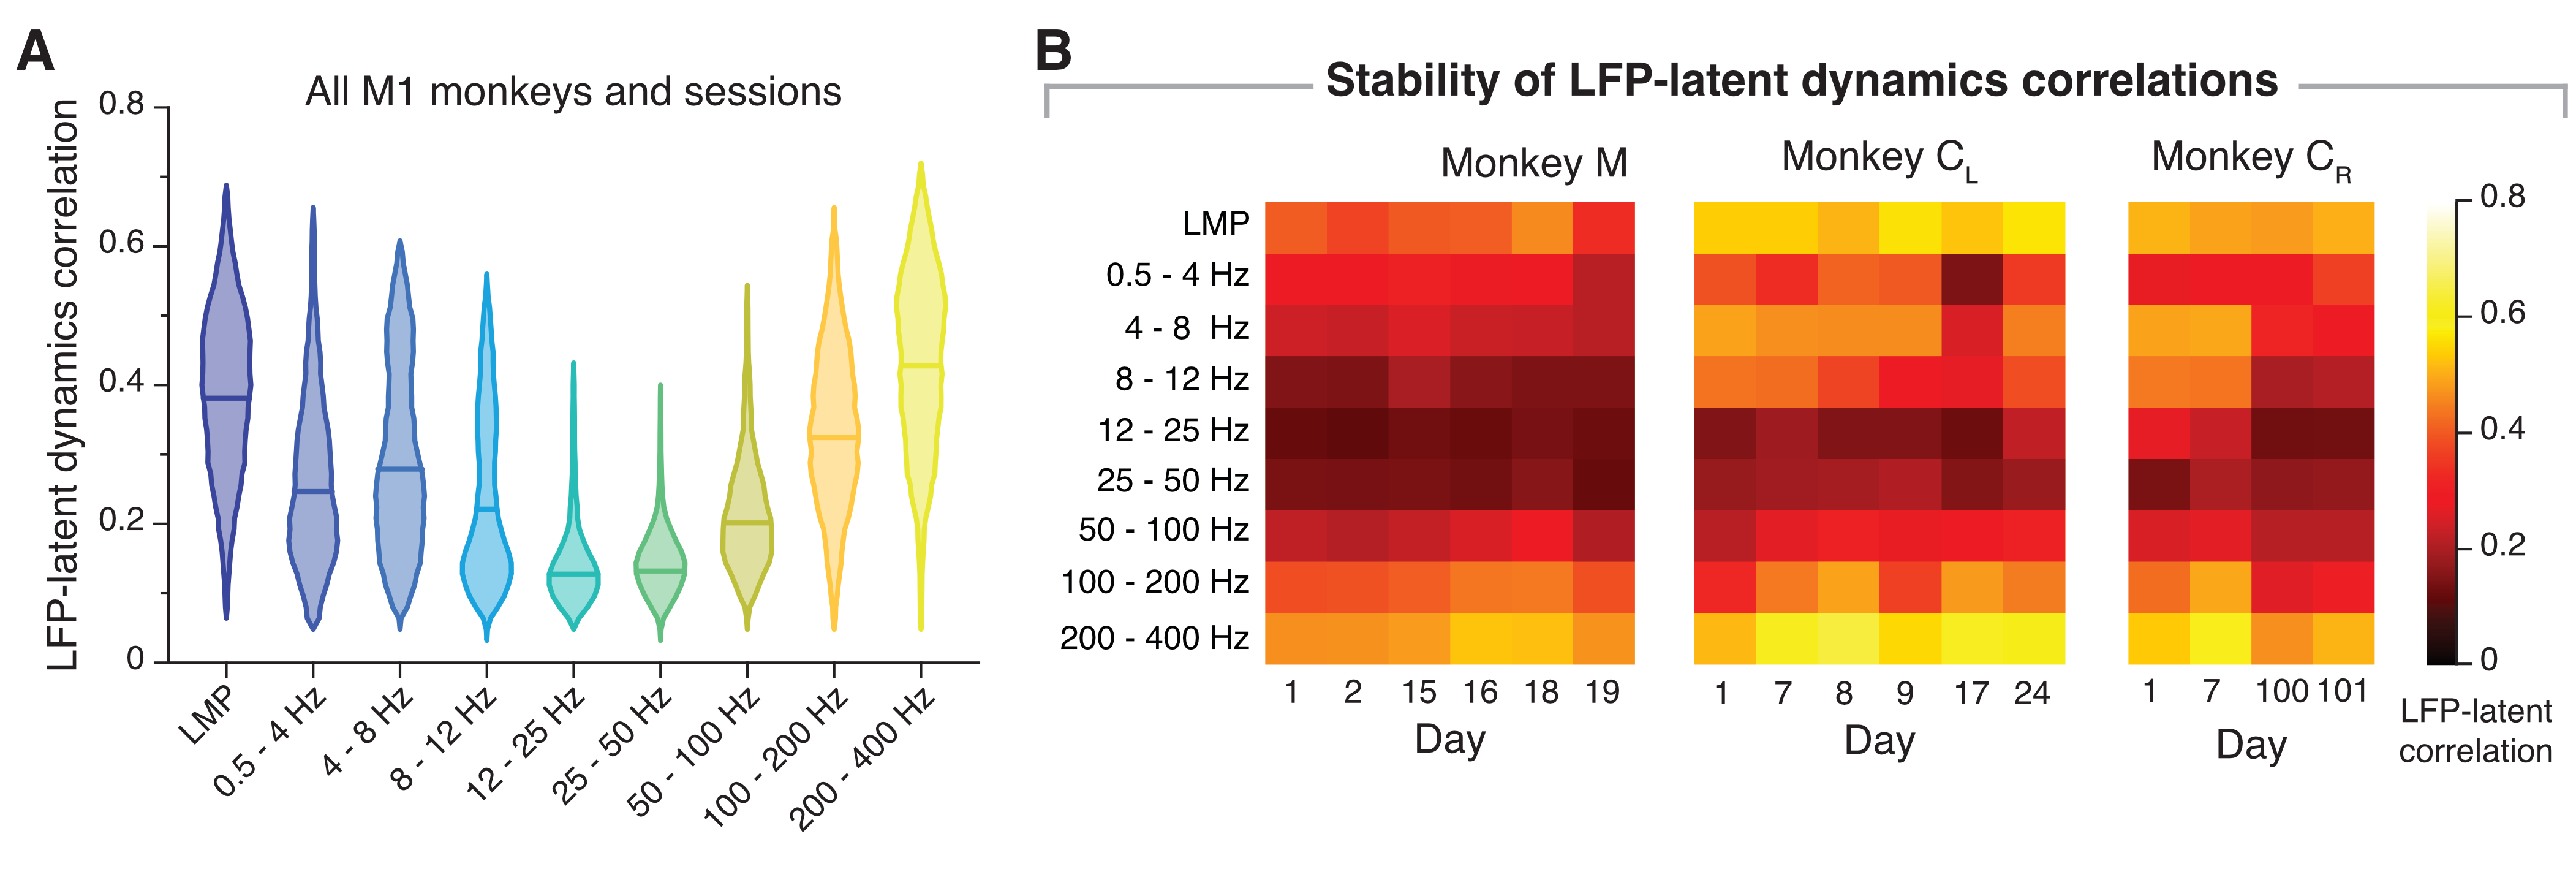

Supplement: supp [file elife-73155-supp-v1.zip › elife_poa_e73155_Figure_3_figure_supplement_1.tif]

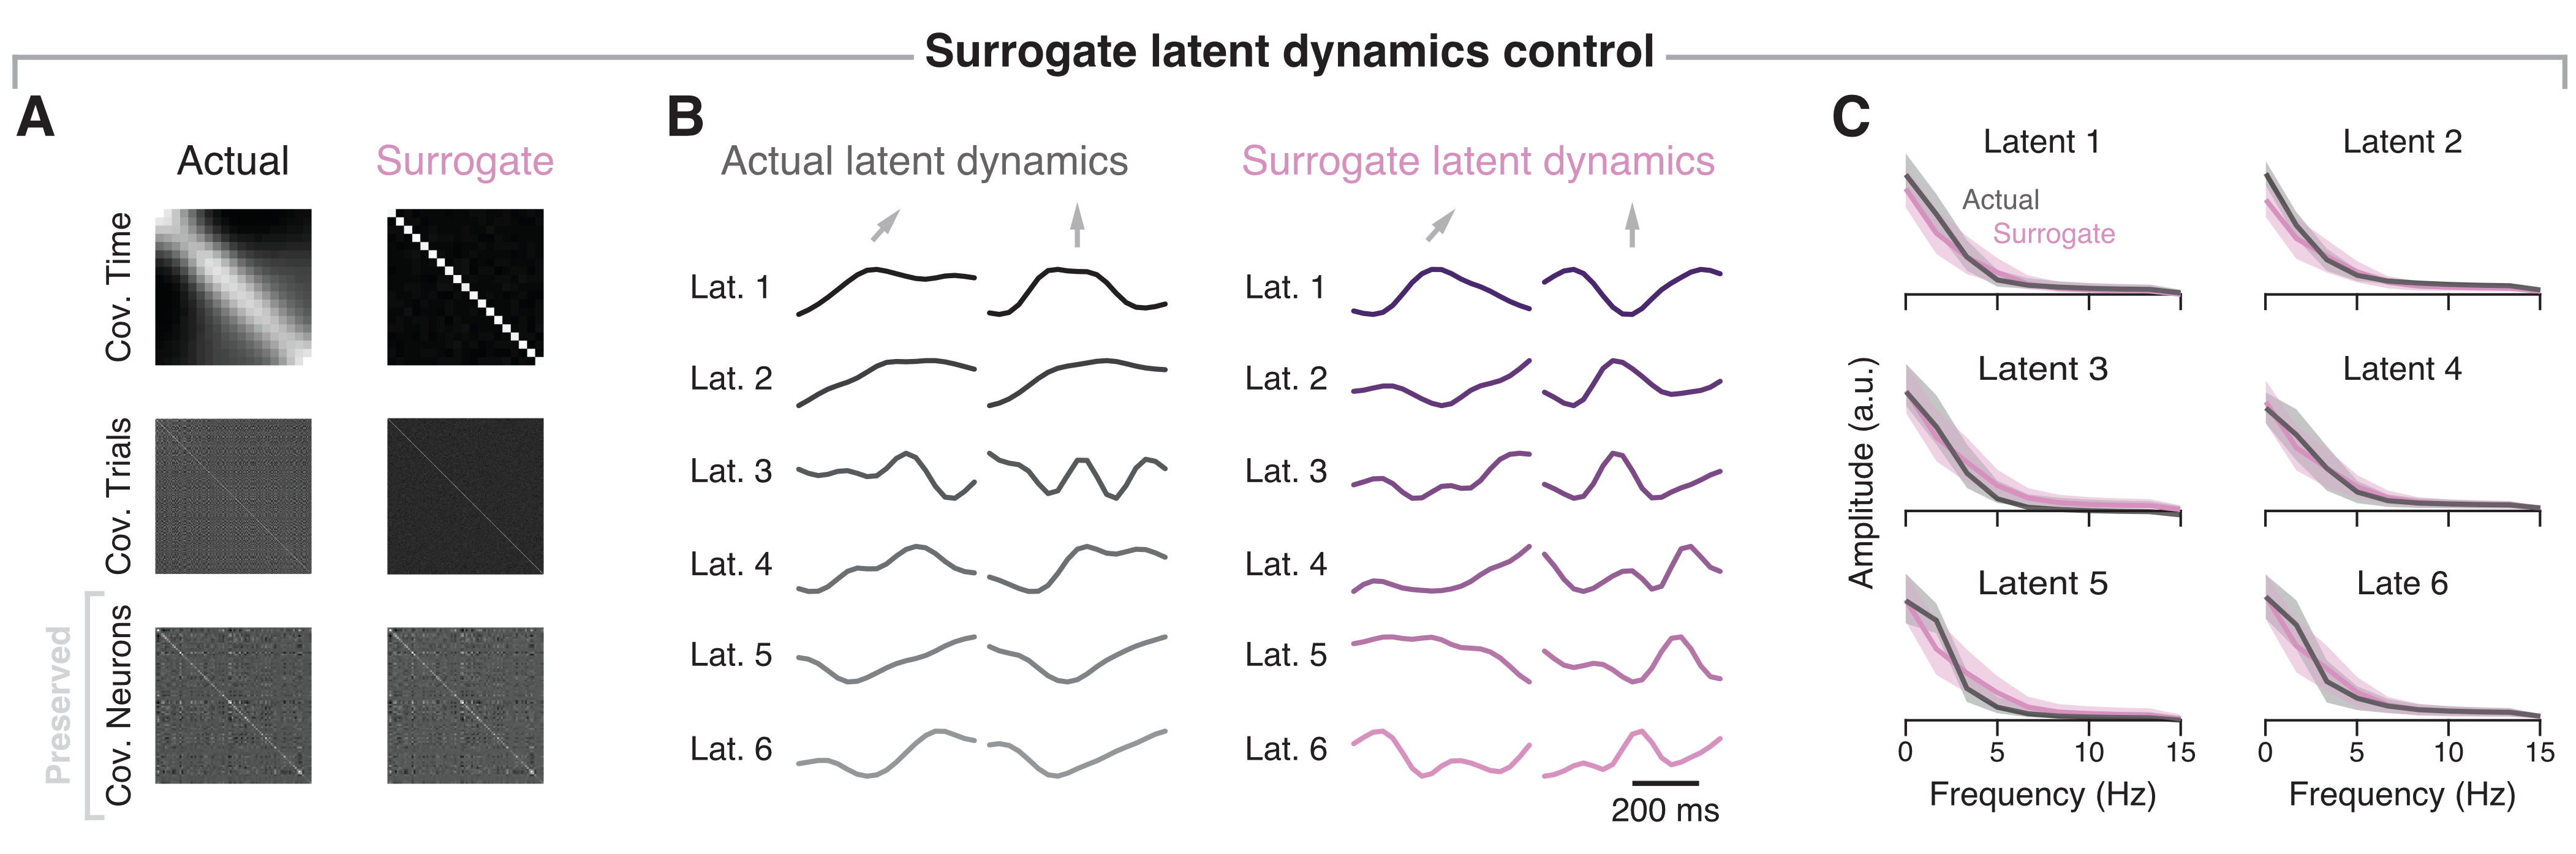

Supplement: supp [file elife-73155-supp-v1.zip › elife_poa_e73155_Figure_3_figure_supplement_2.tif]

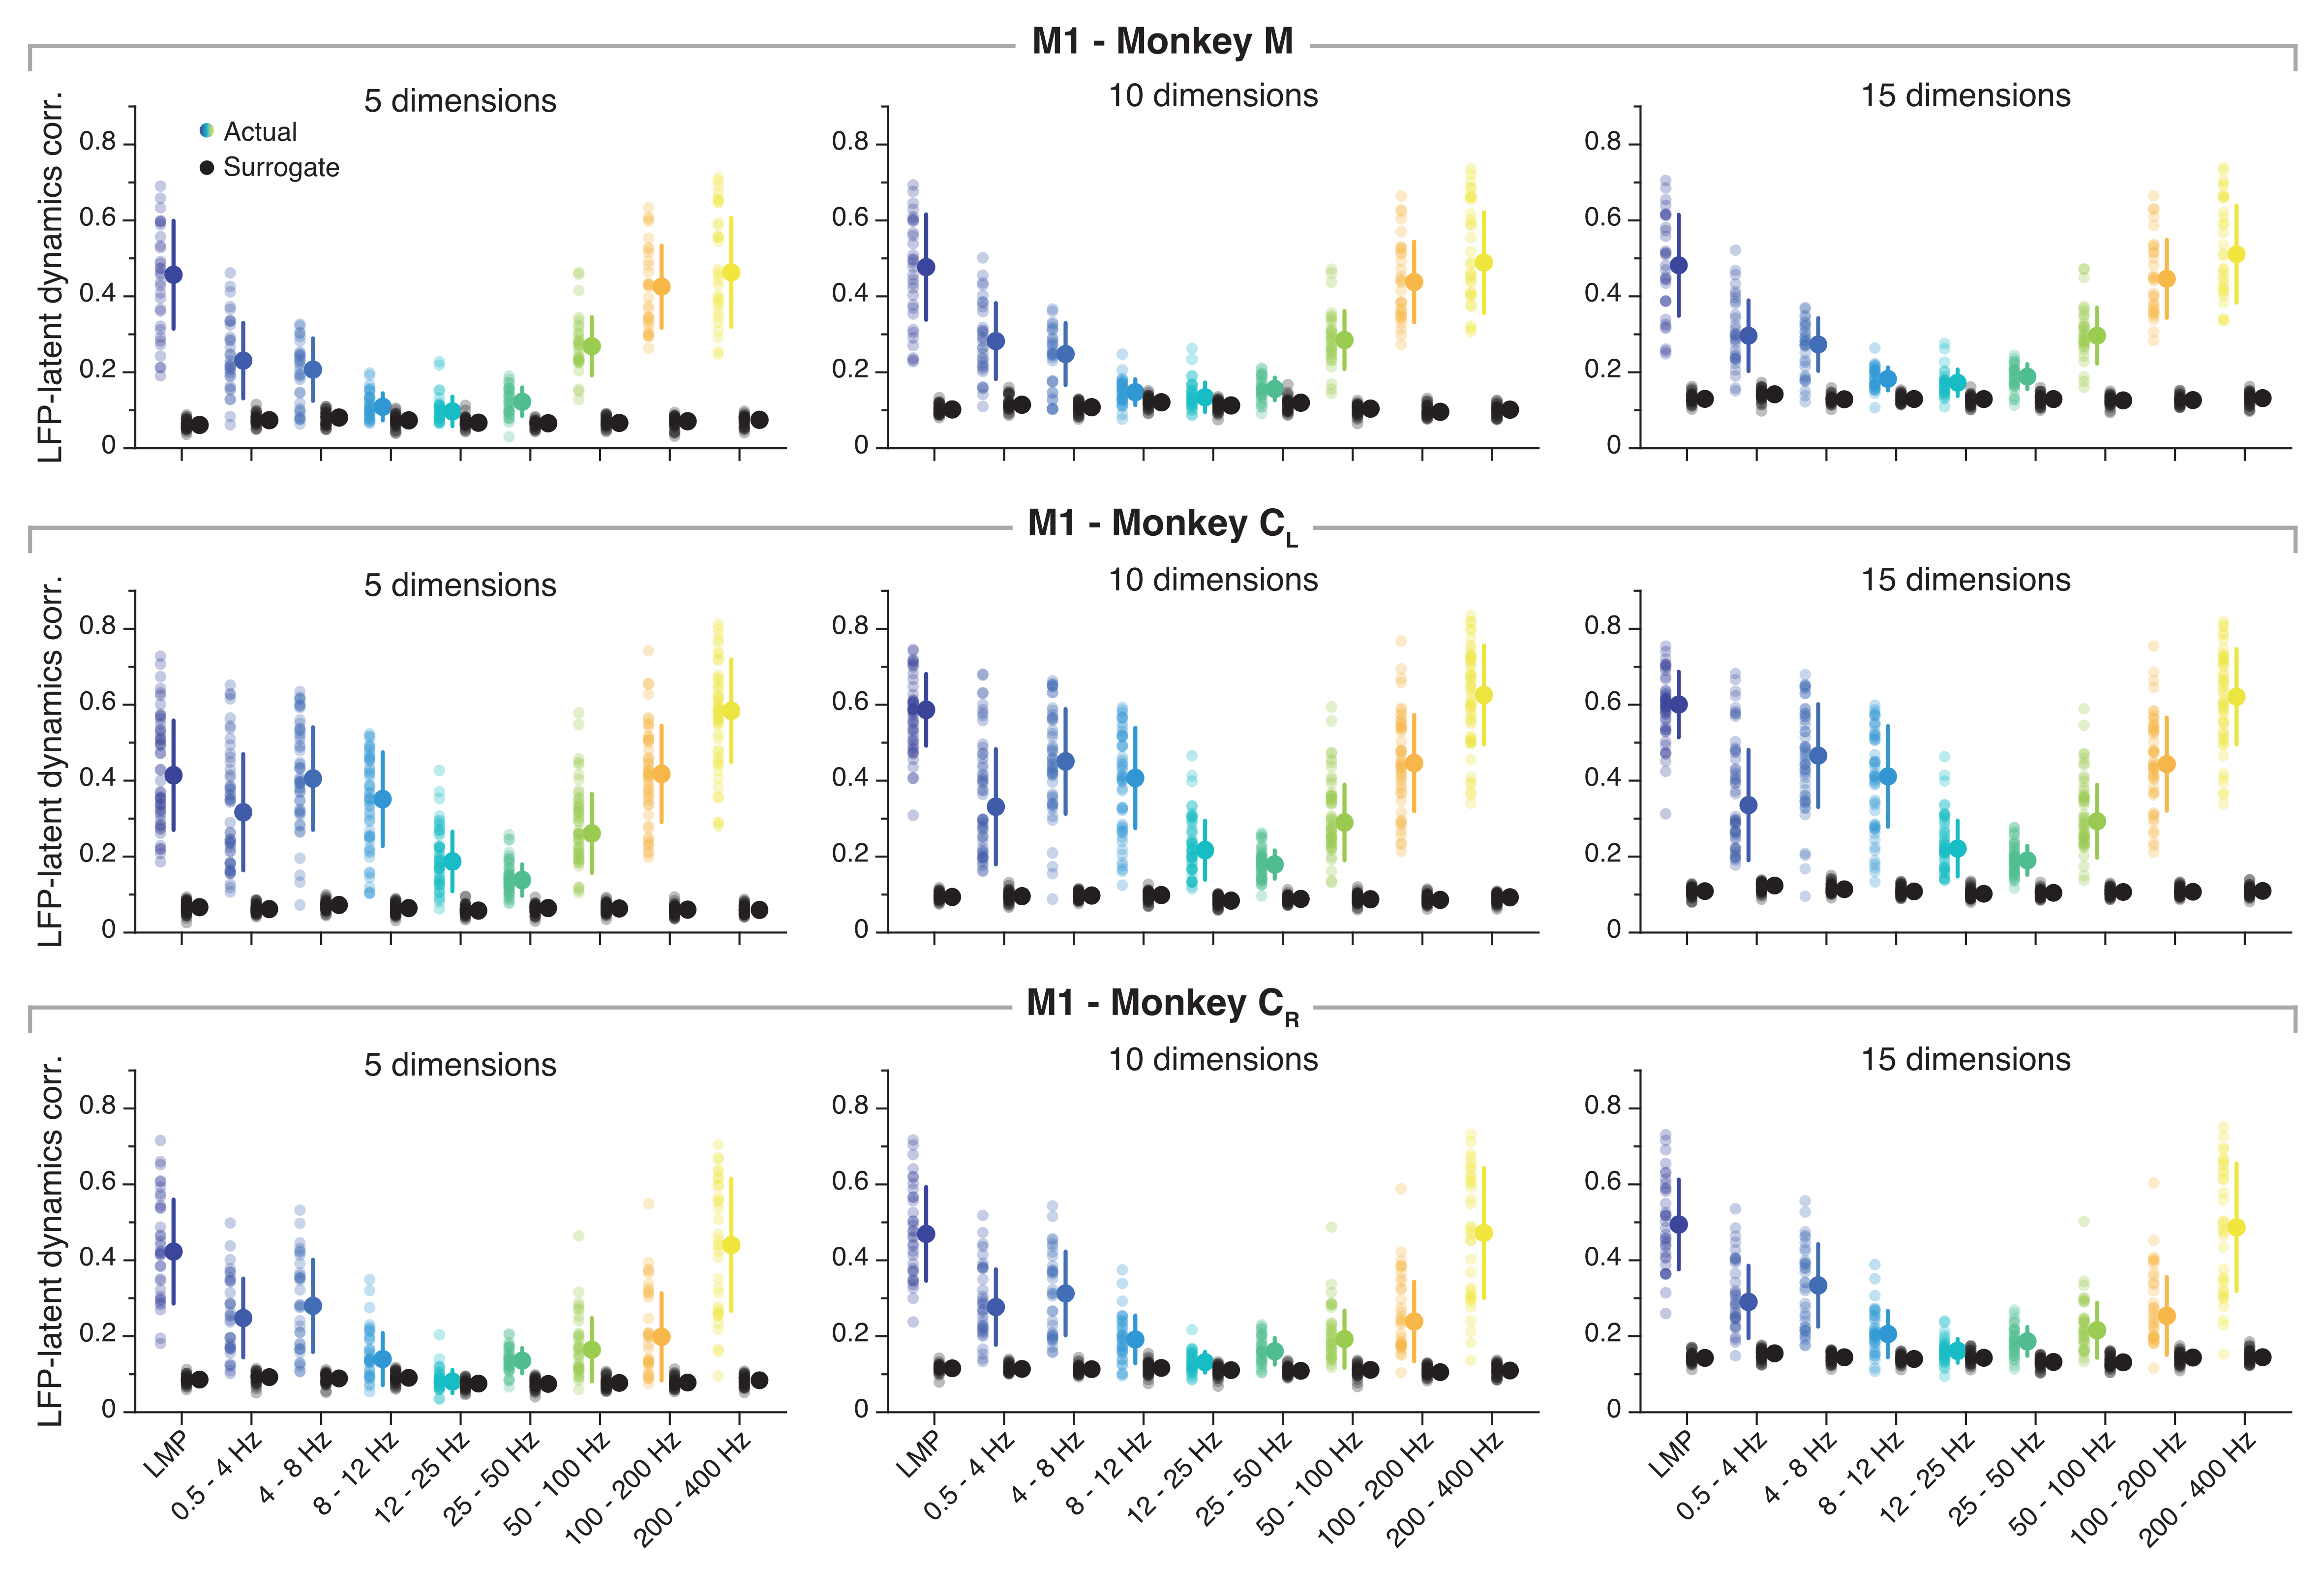

Supplement: supp [file elife-73155-supp-v1.zip › elife_poa_e73155_Figure_3_figure_supplement_3.tif]

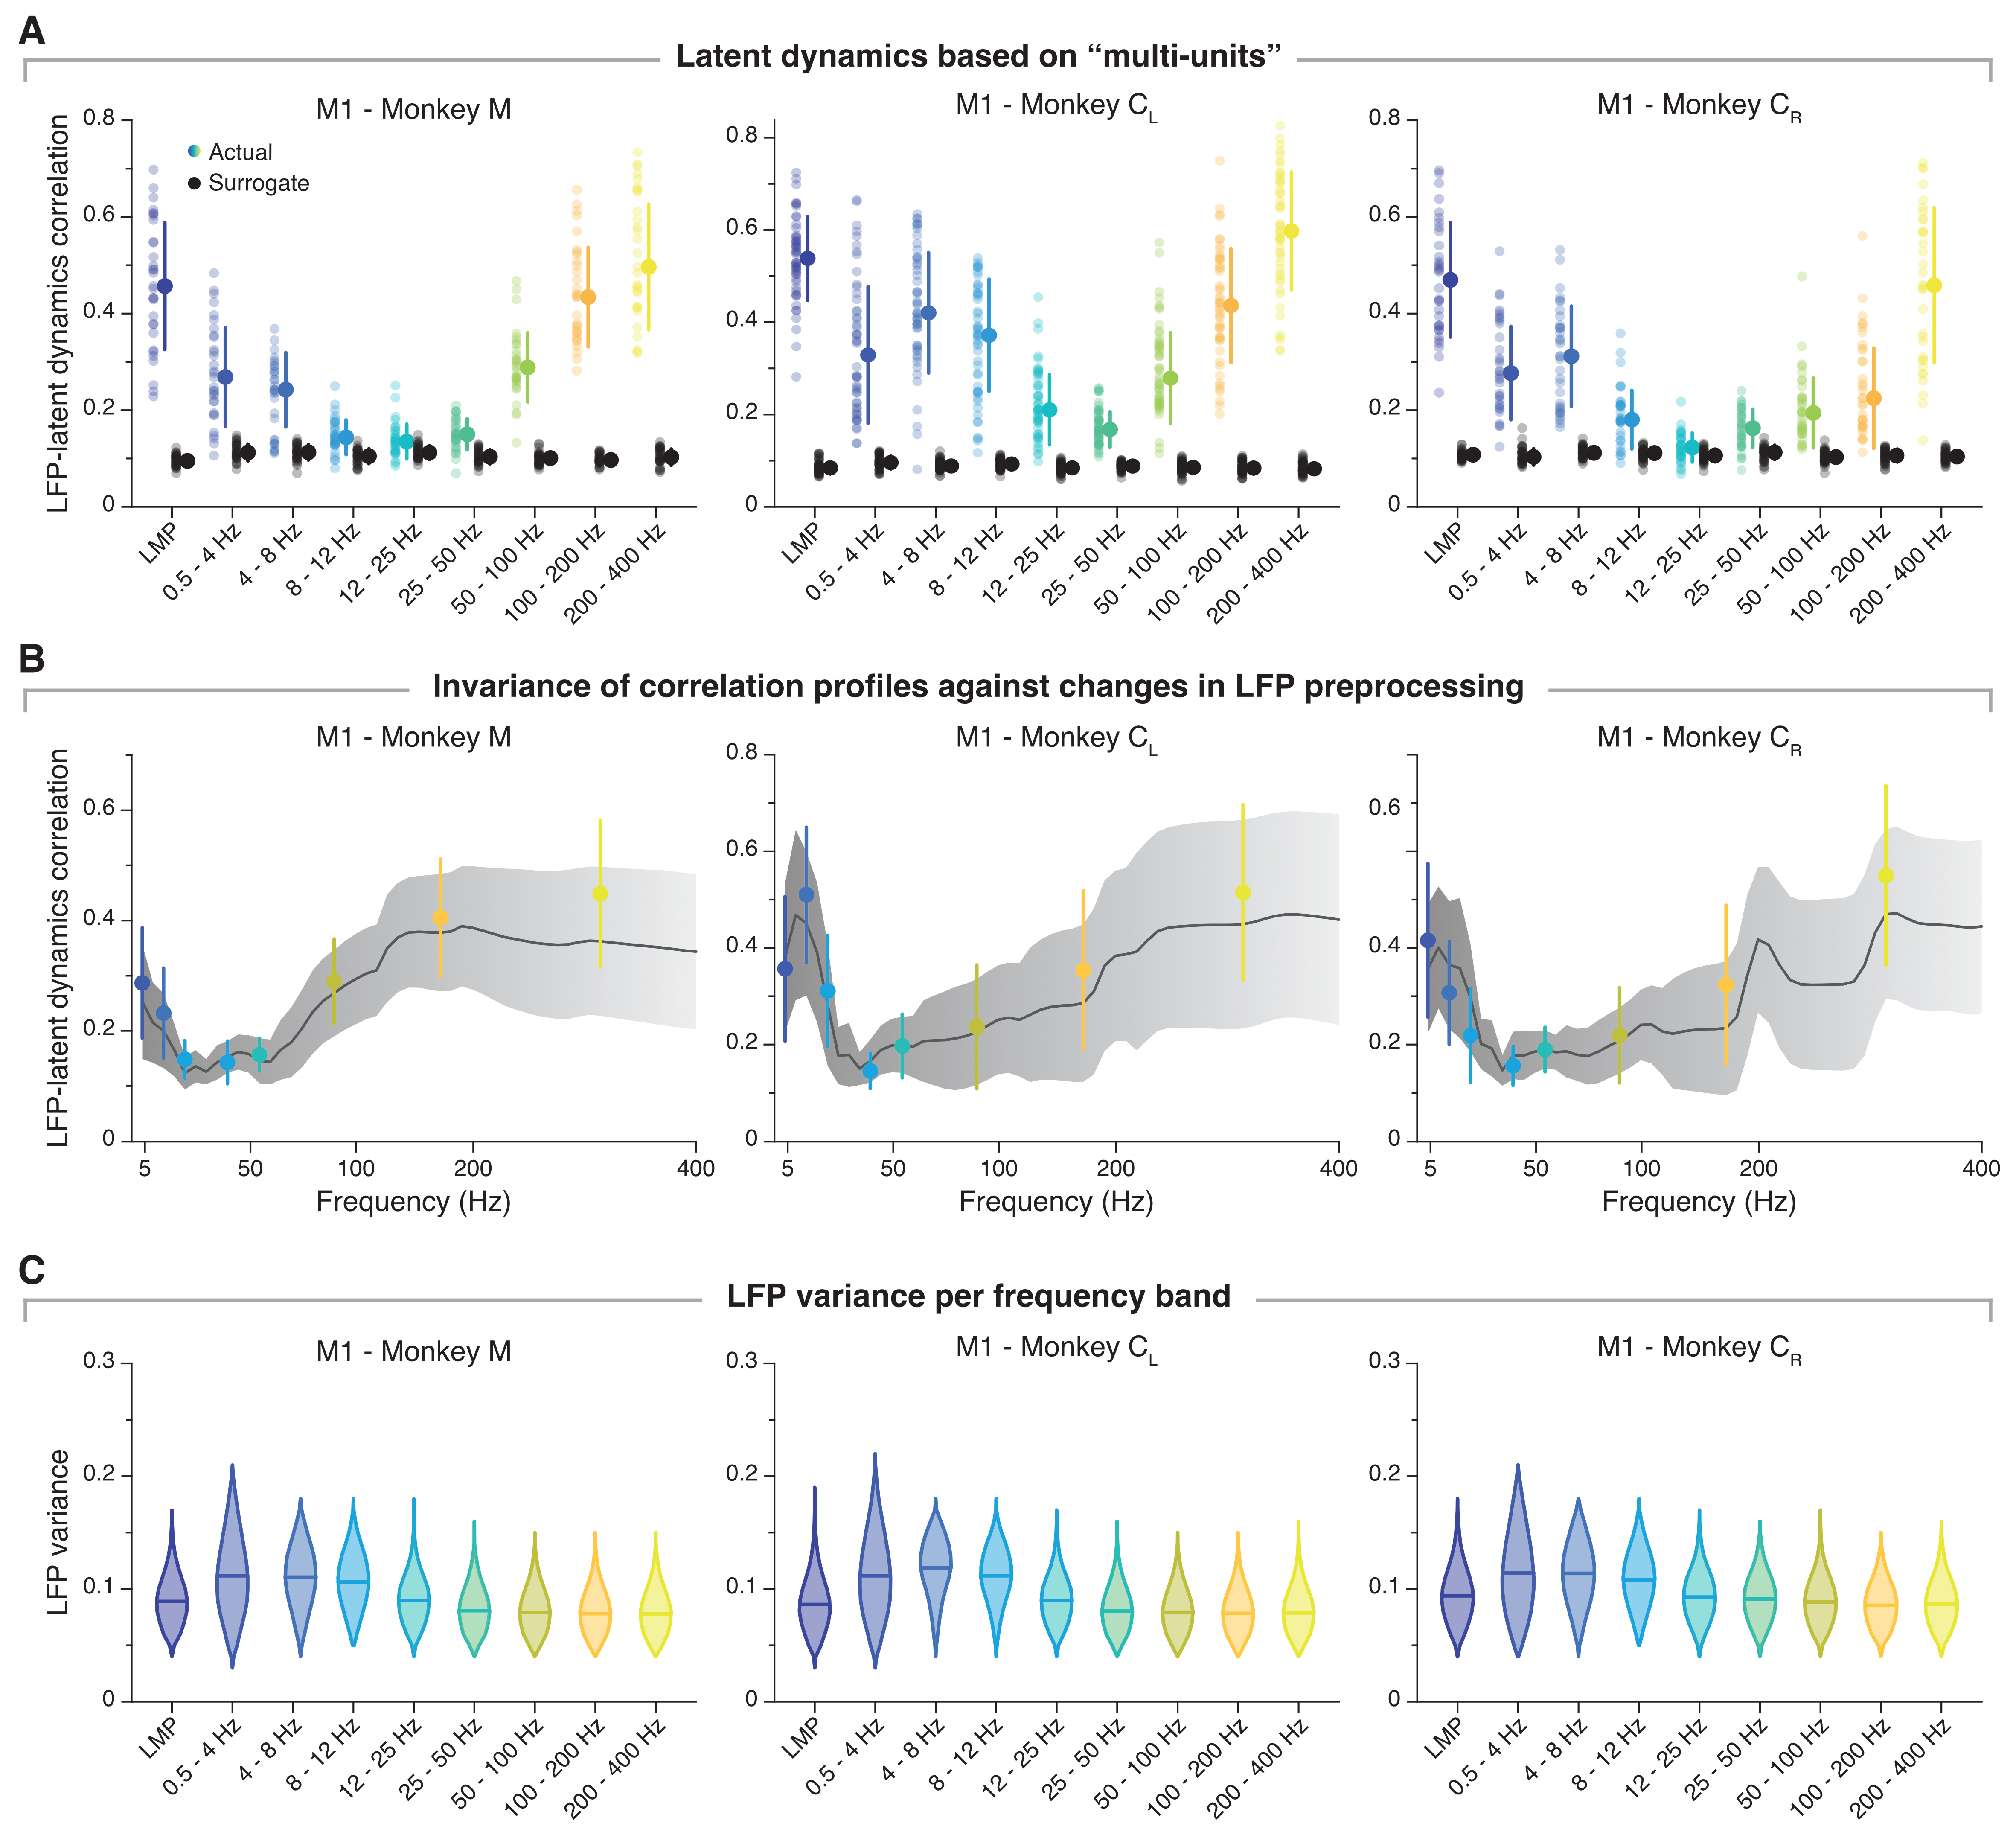

Supplement: supp [file elife-73155-supp-v1.zip › elife_poa_e73155_Figure_3_figure_supplement_4.tif]

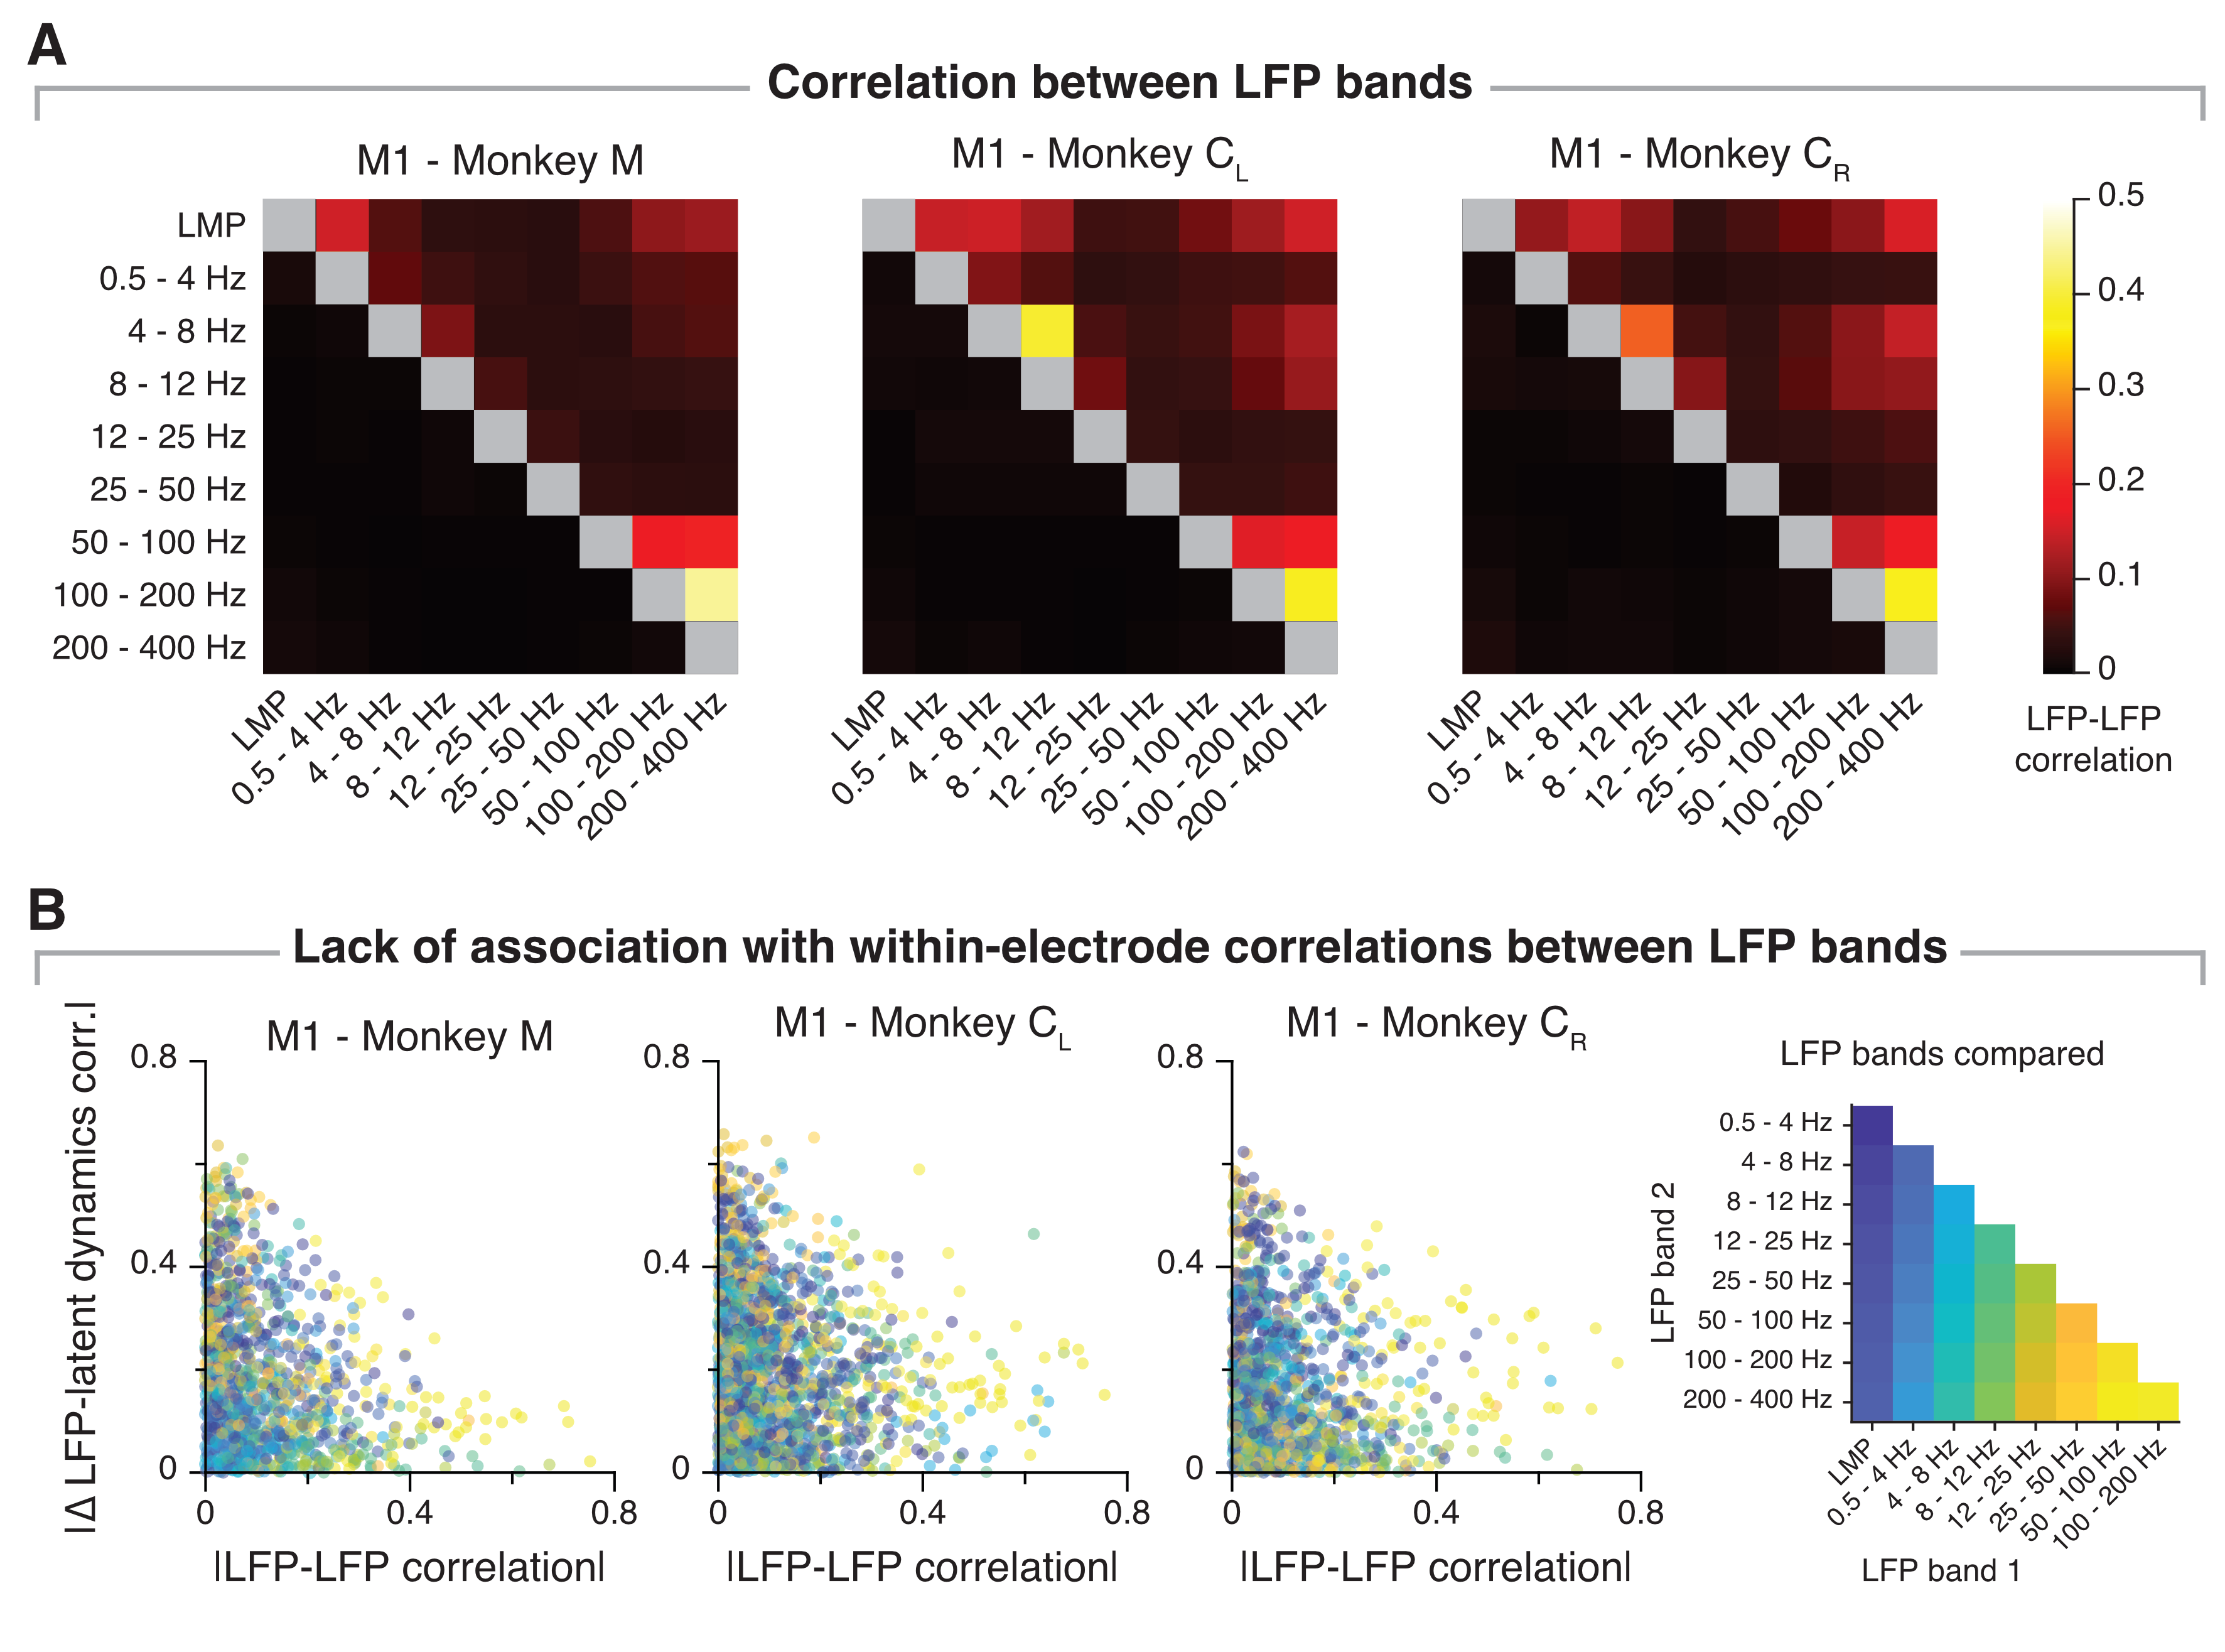

Supplement: supp [file elife-73155-supp-v1.zip › elife_poa_e73155_Figure_3_figure_supplement_5.tif]

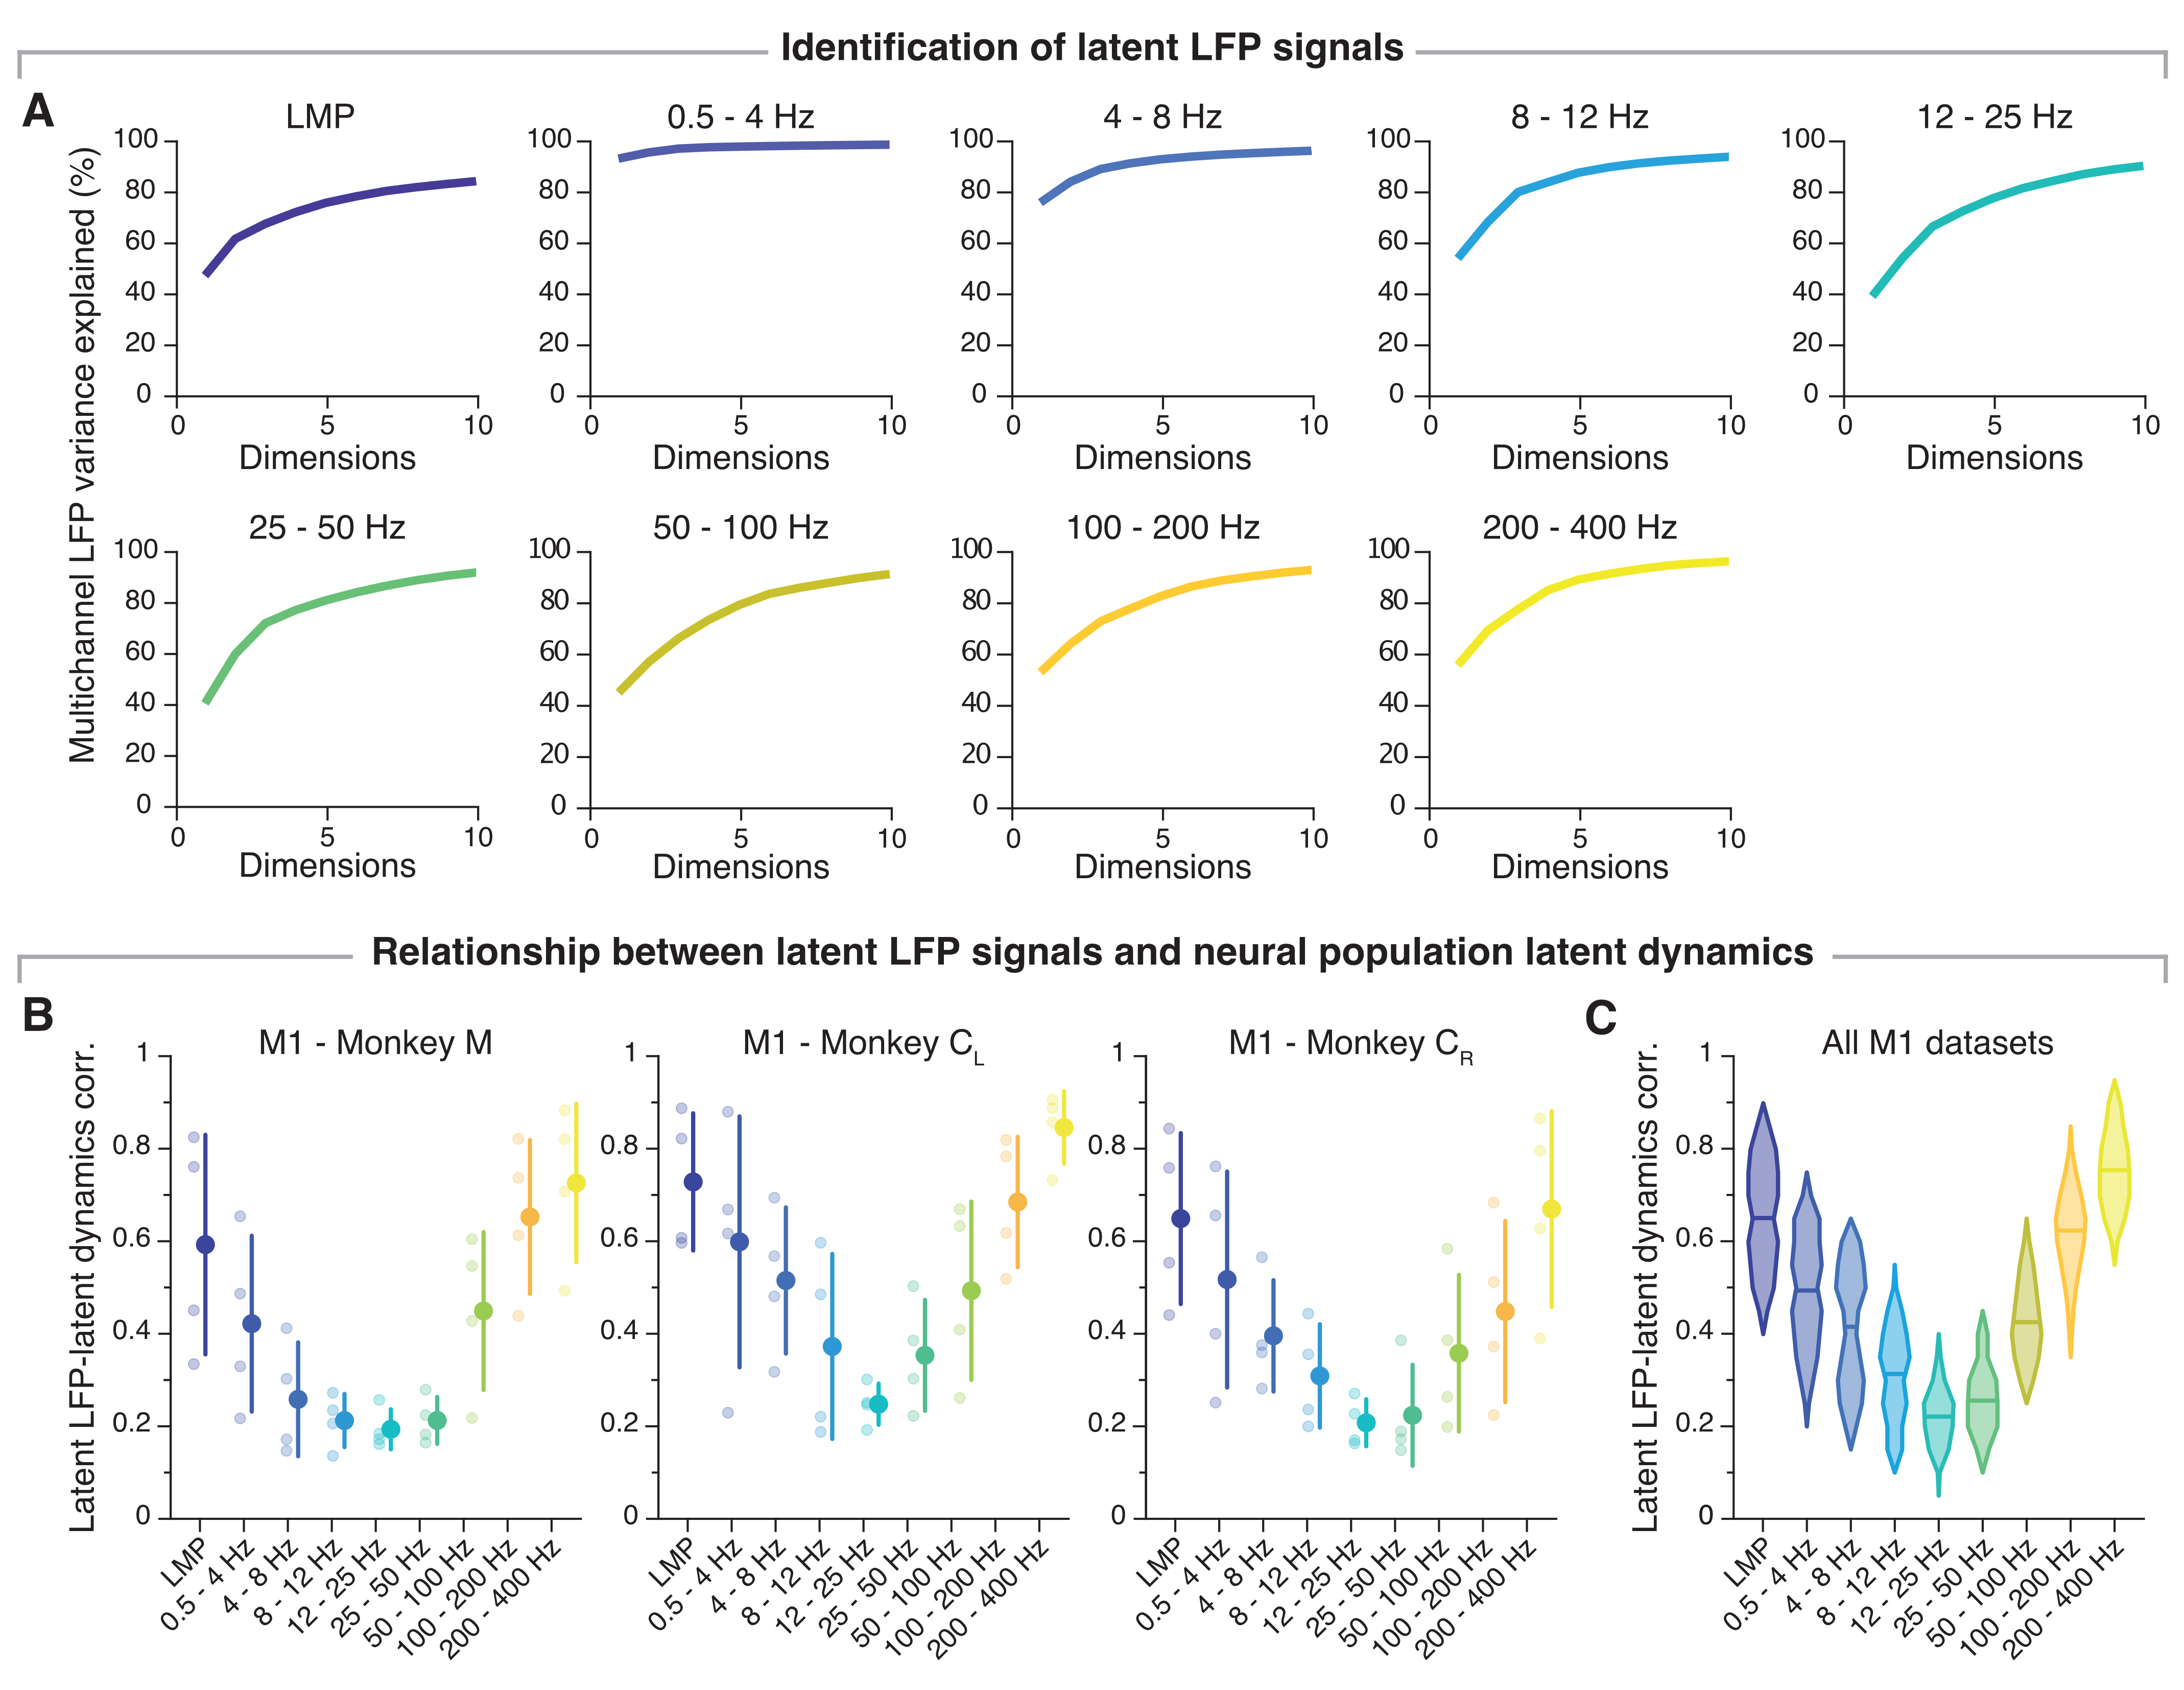

Supplement: supp [file elife-73155-supp-v1.zip › elife_poa_e73155_Figure_3_figure_supplement_6.tif]

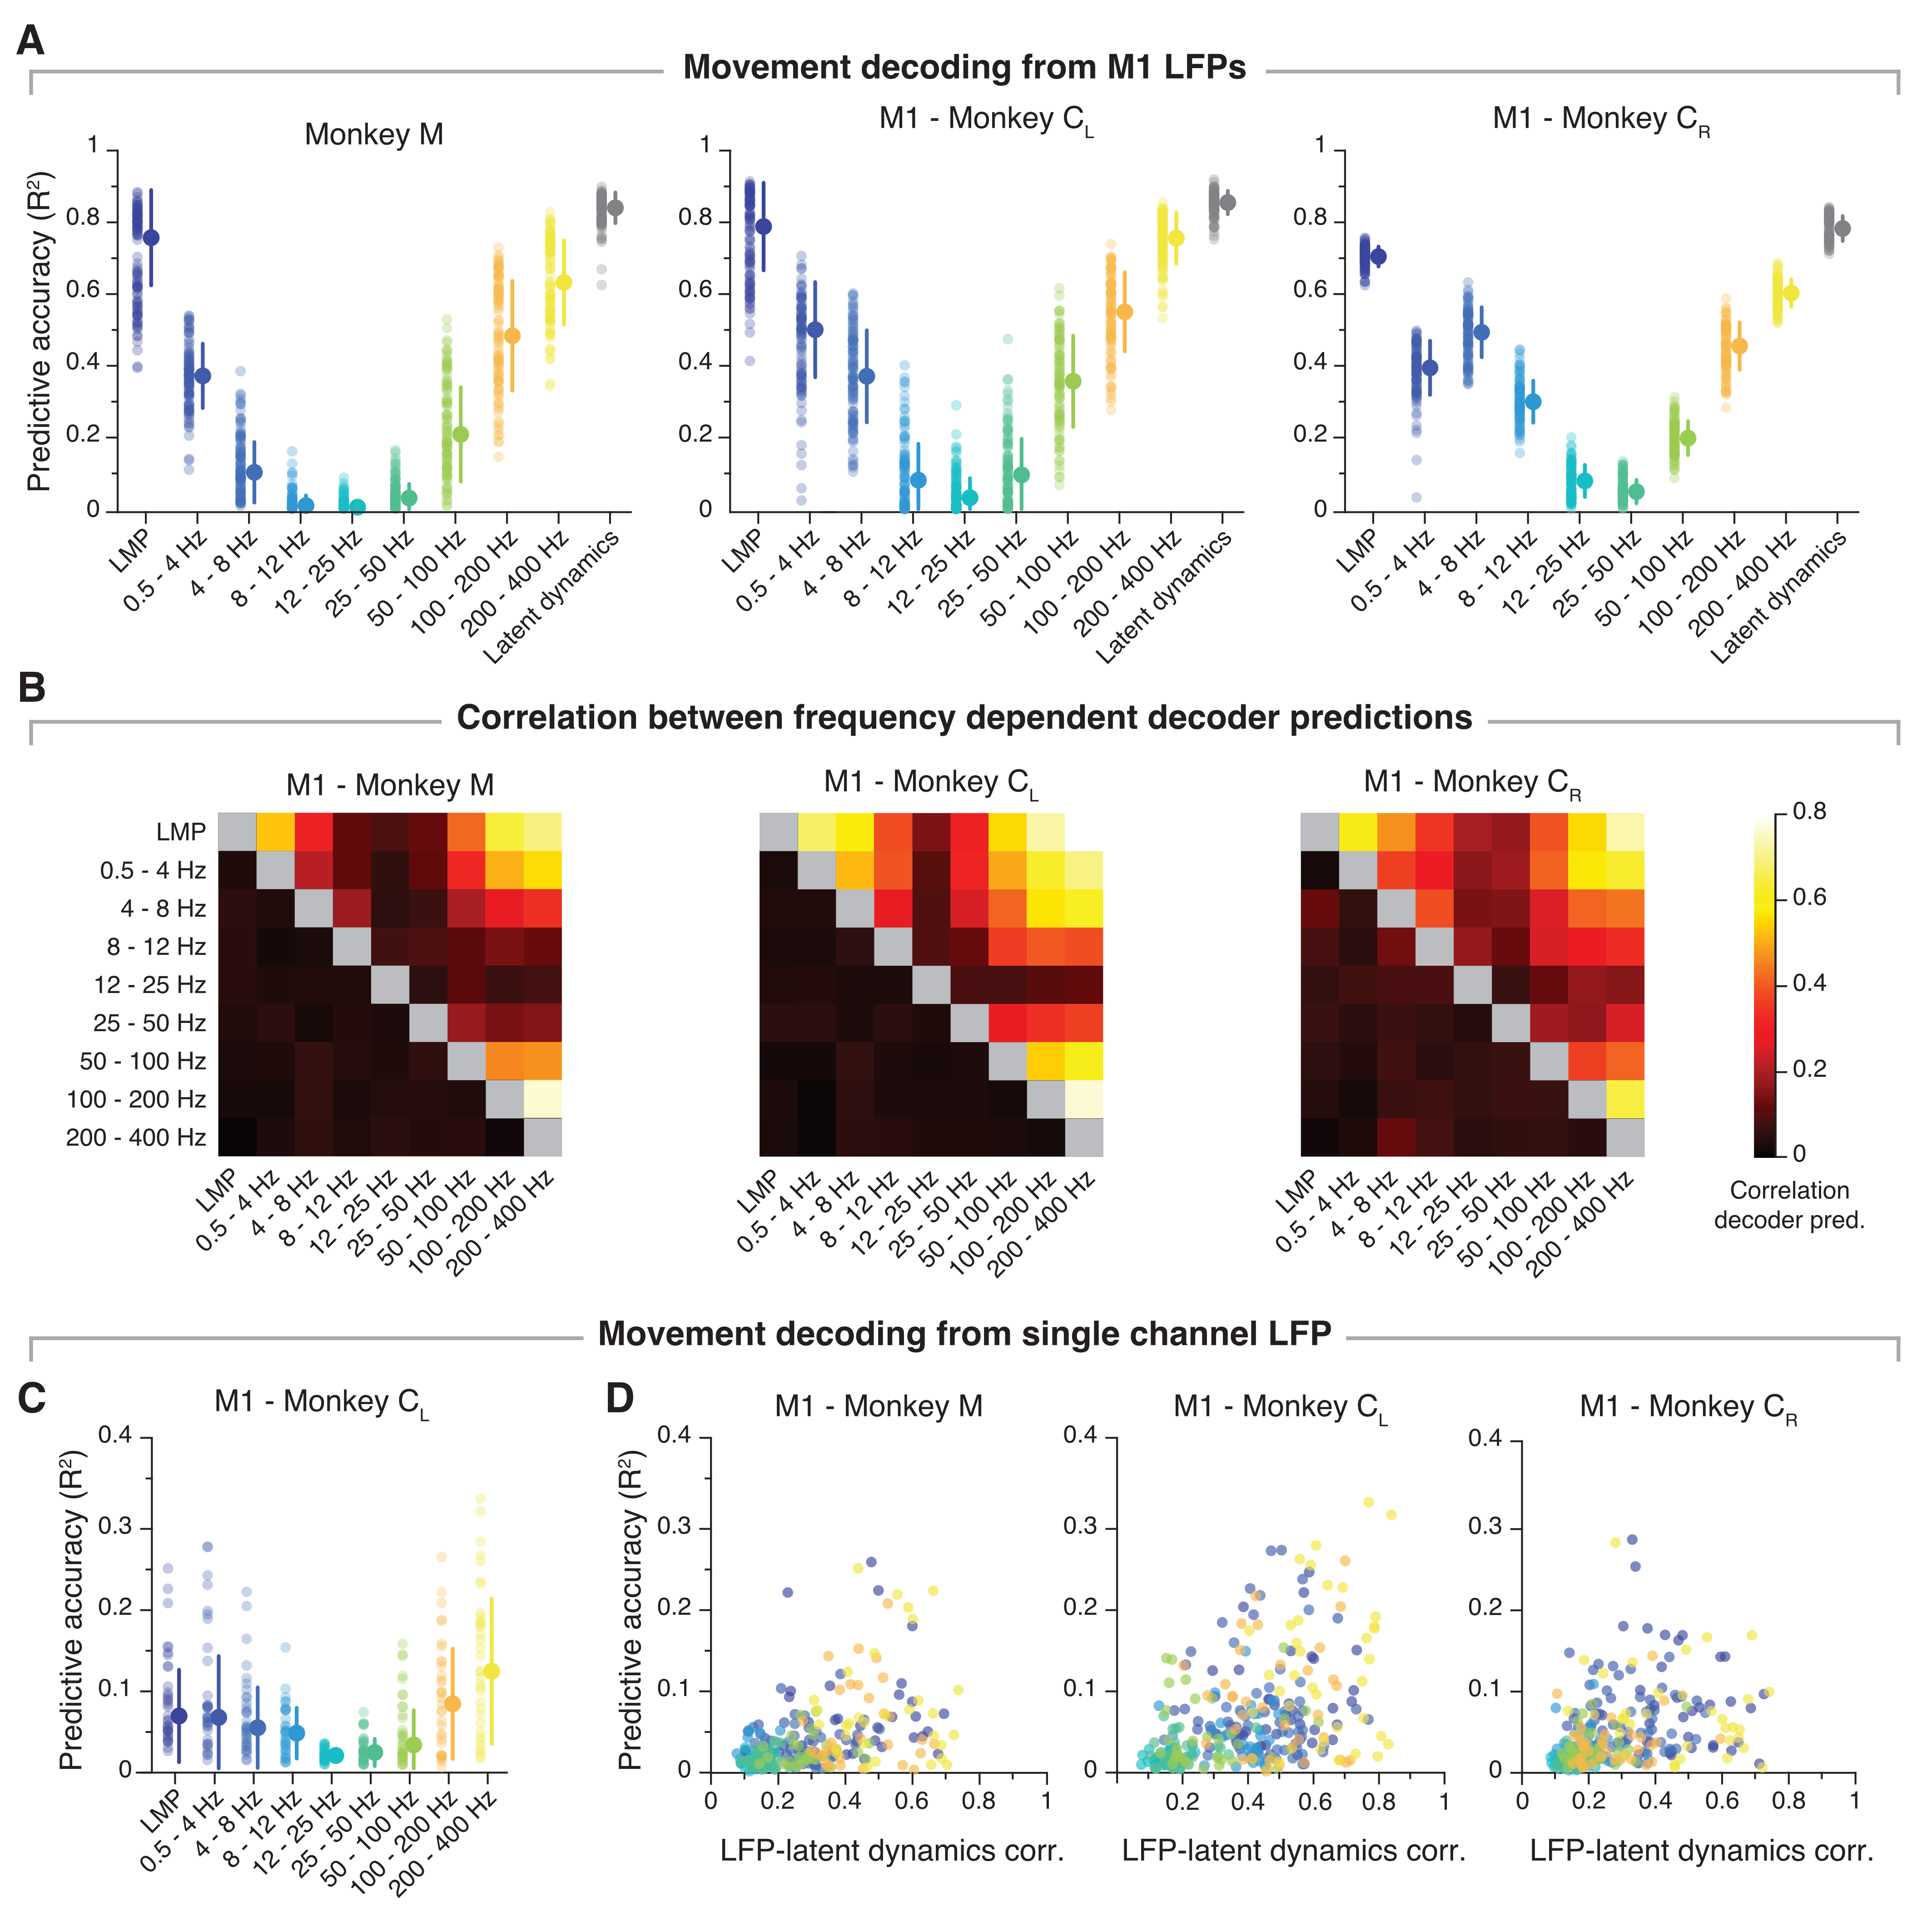

Supplement: supp [file elife-73155-supp-v1.zip › elife_poa_e73155_Figure_4_figure_supplement_1.tif]

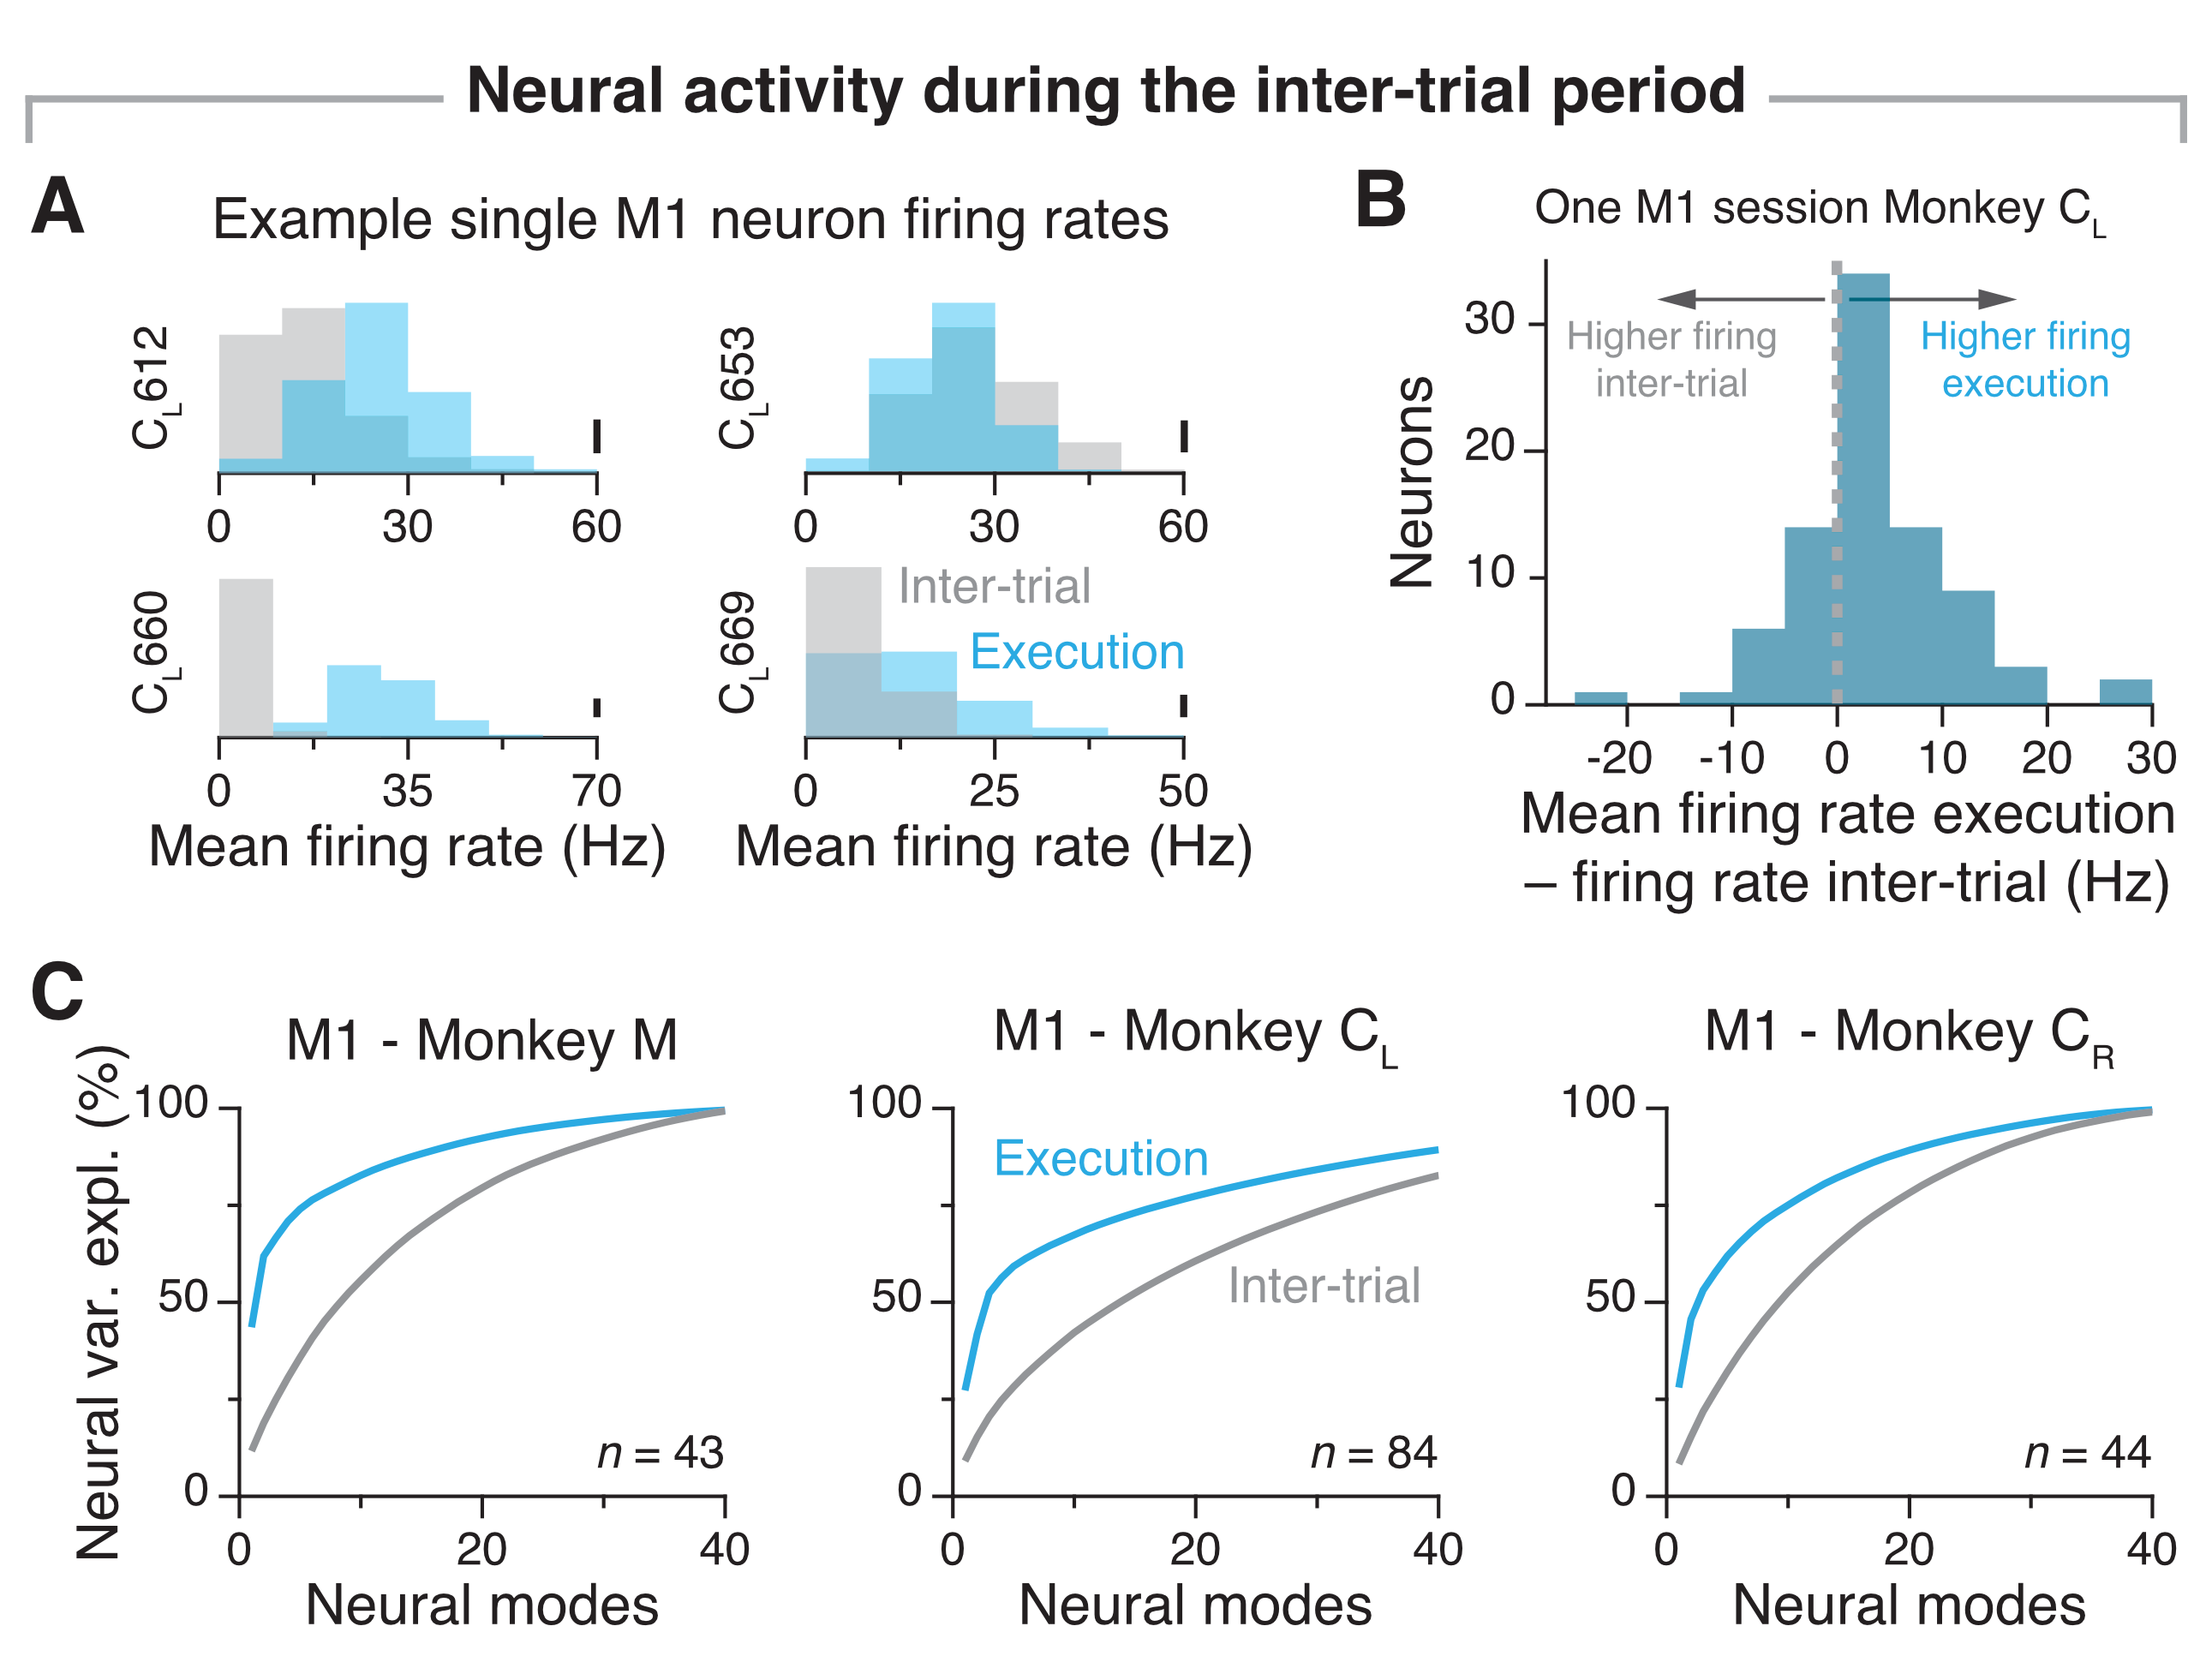

Supplement: supp [file elife-73155-supp-v1.zip › elife_poa_e73155_Figure_5_figure_supplement_1.tif]

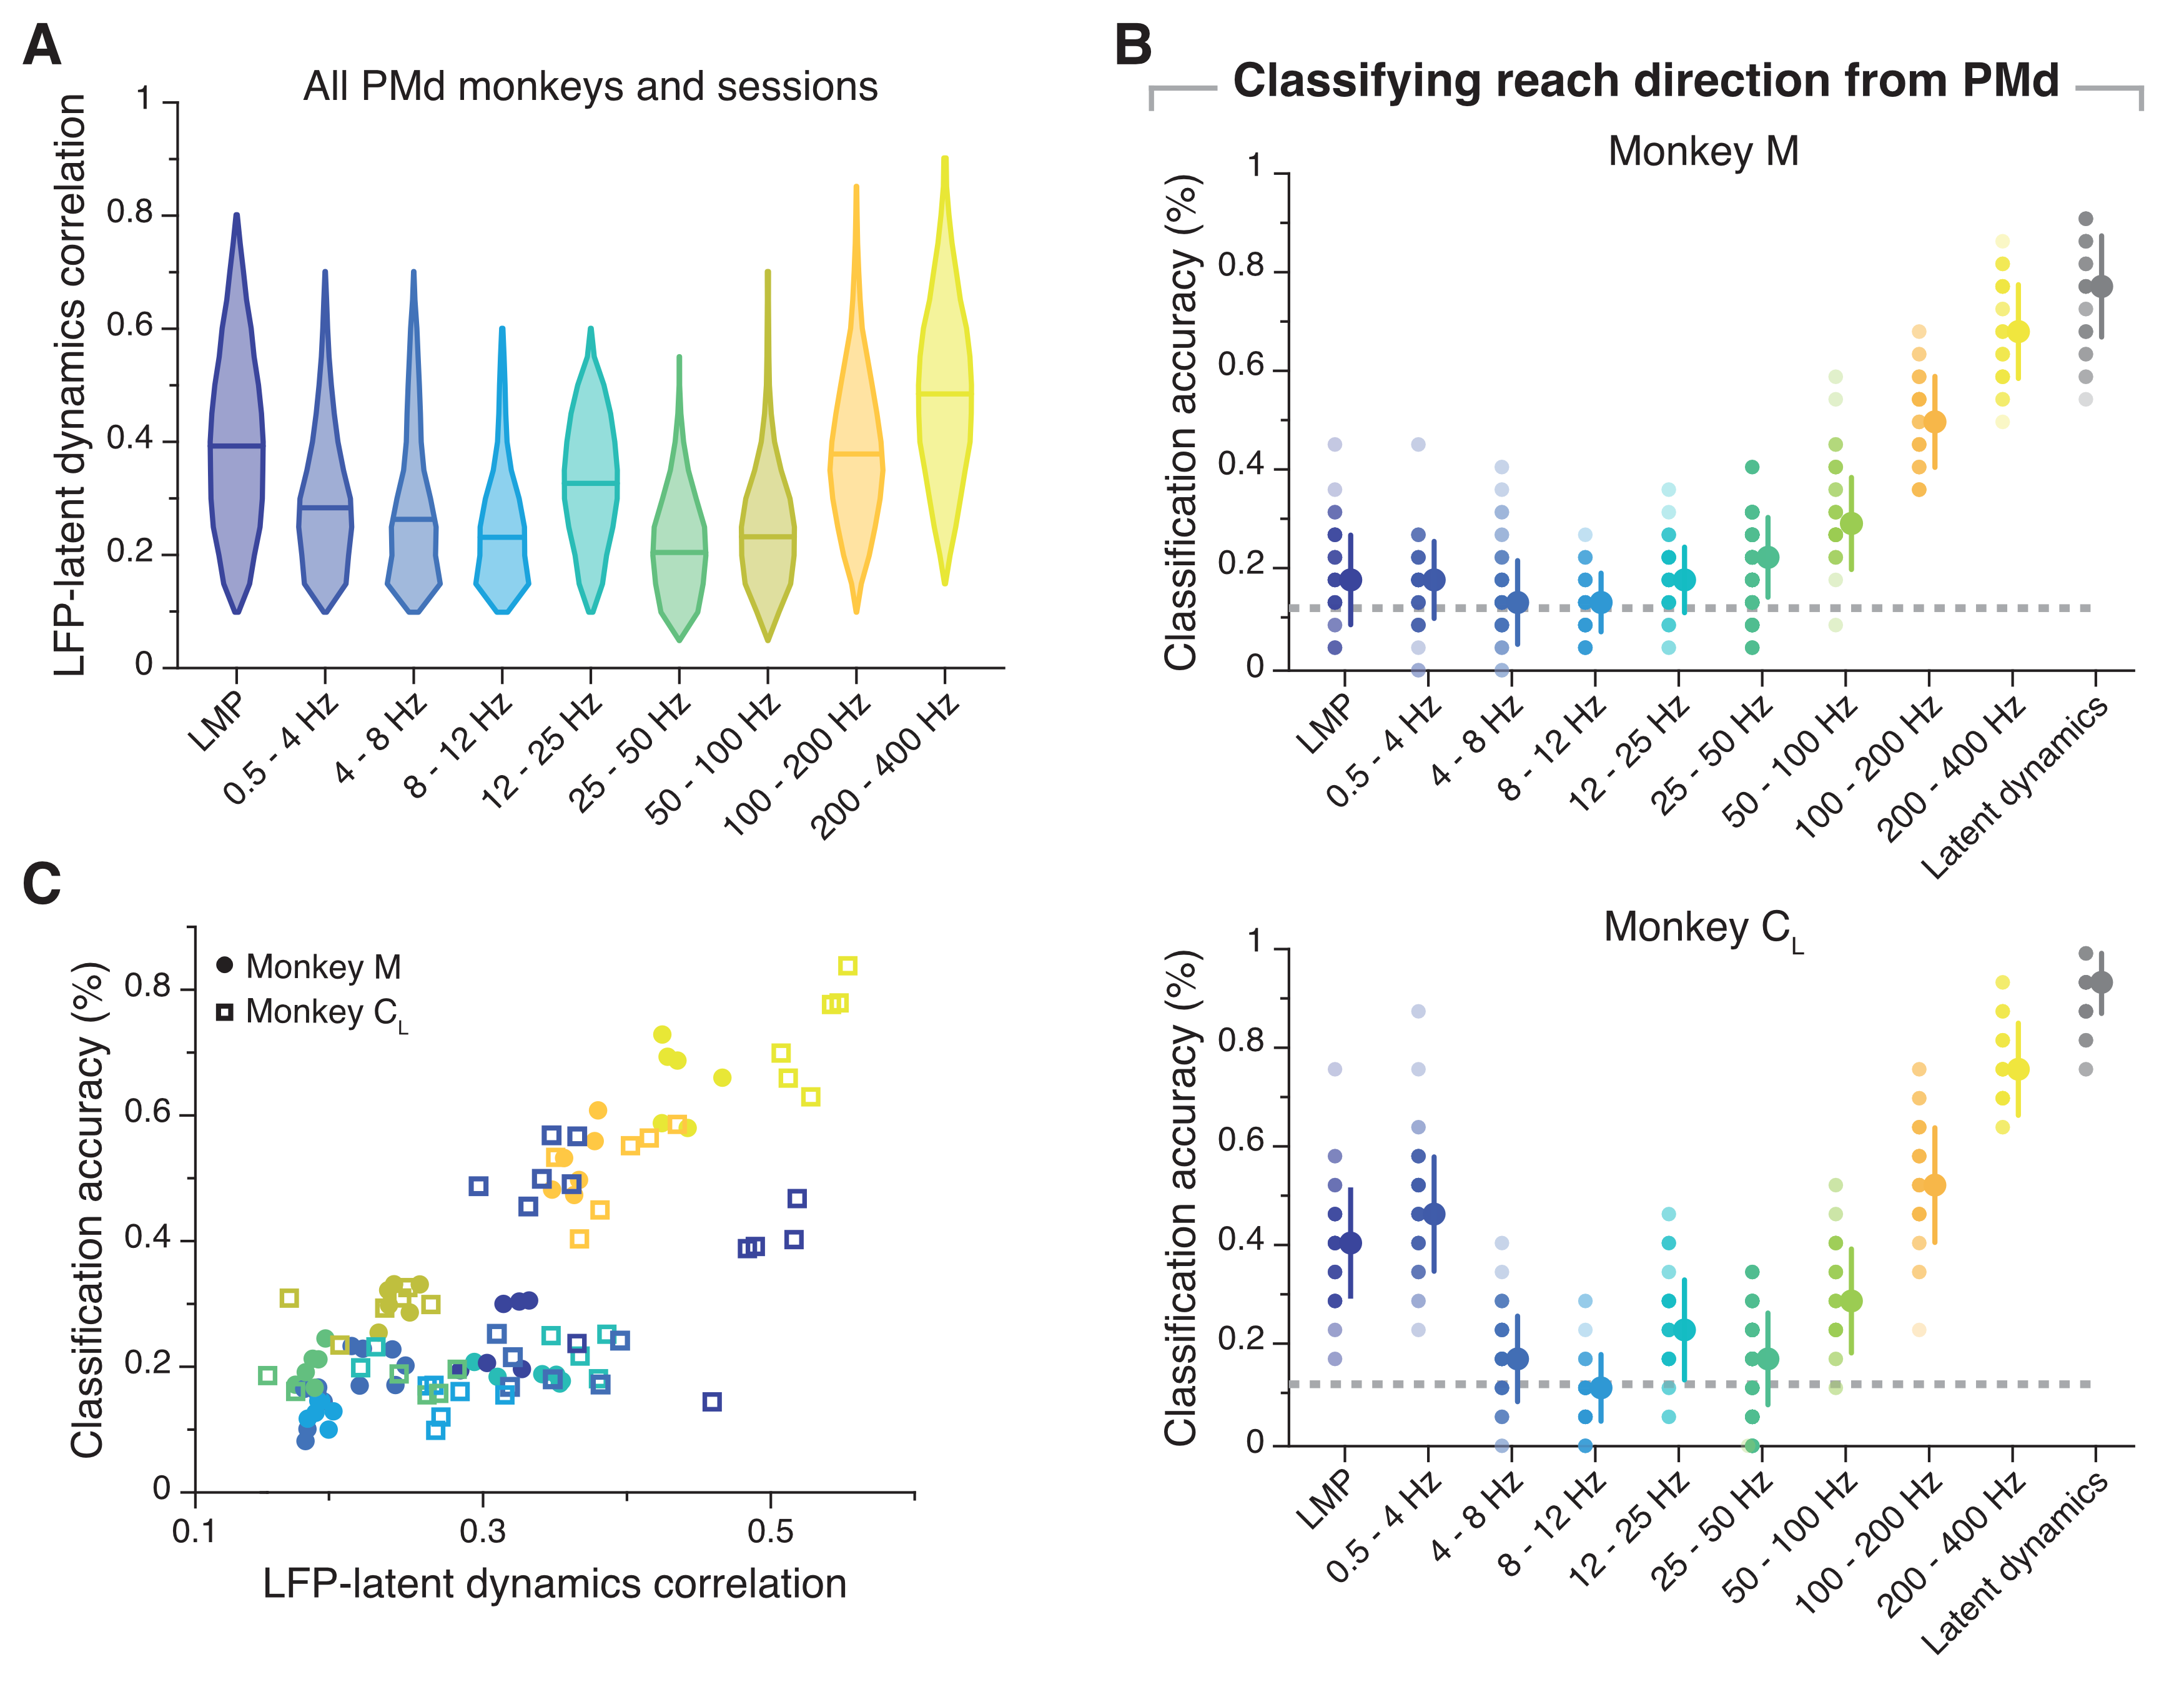

Supplement: supp [file elife-73155-supp-v1.zip › elife_poa_e73155_Figure_6_figure_supplement_1.tif]

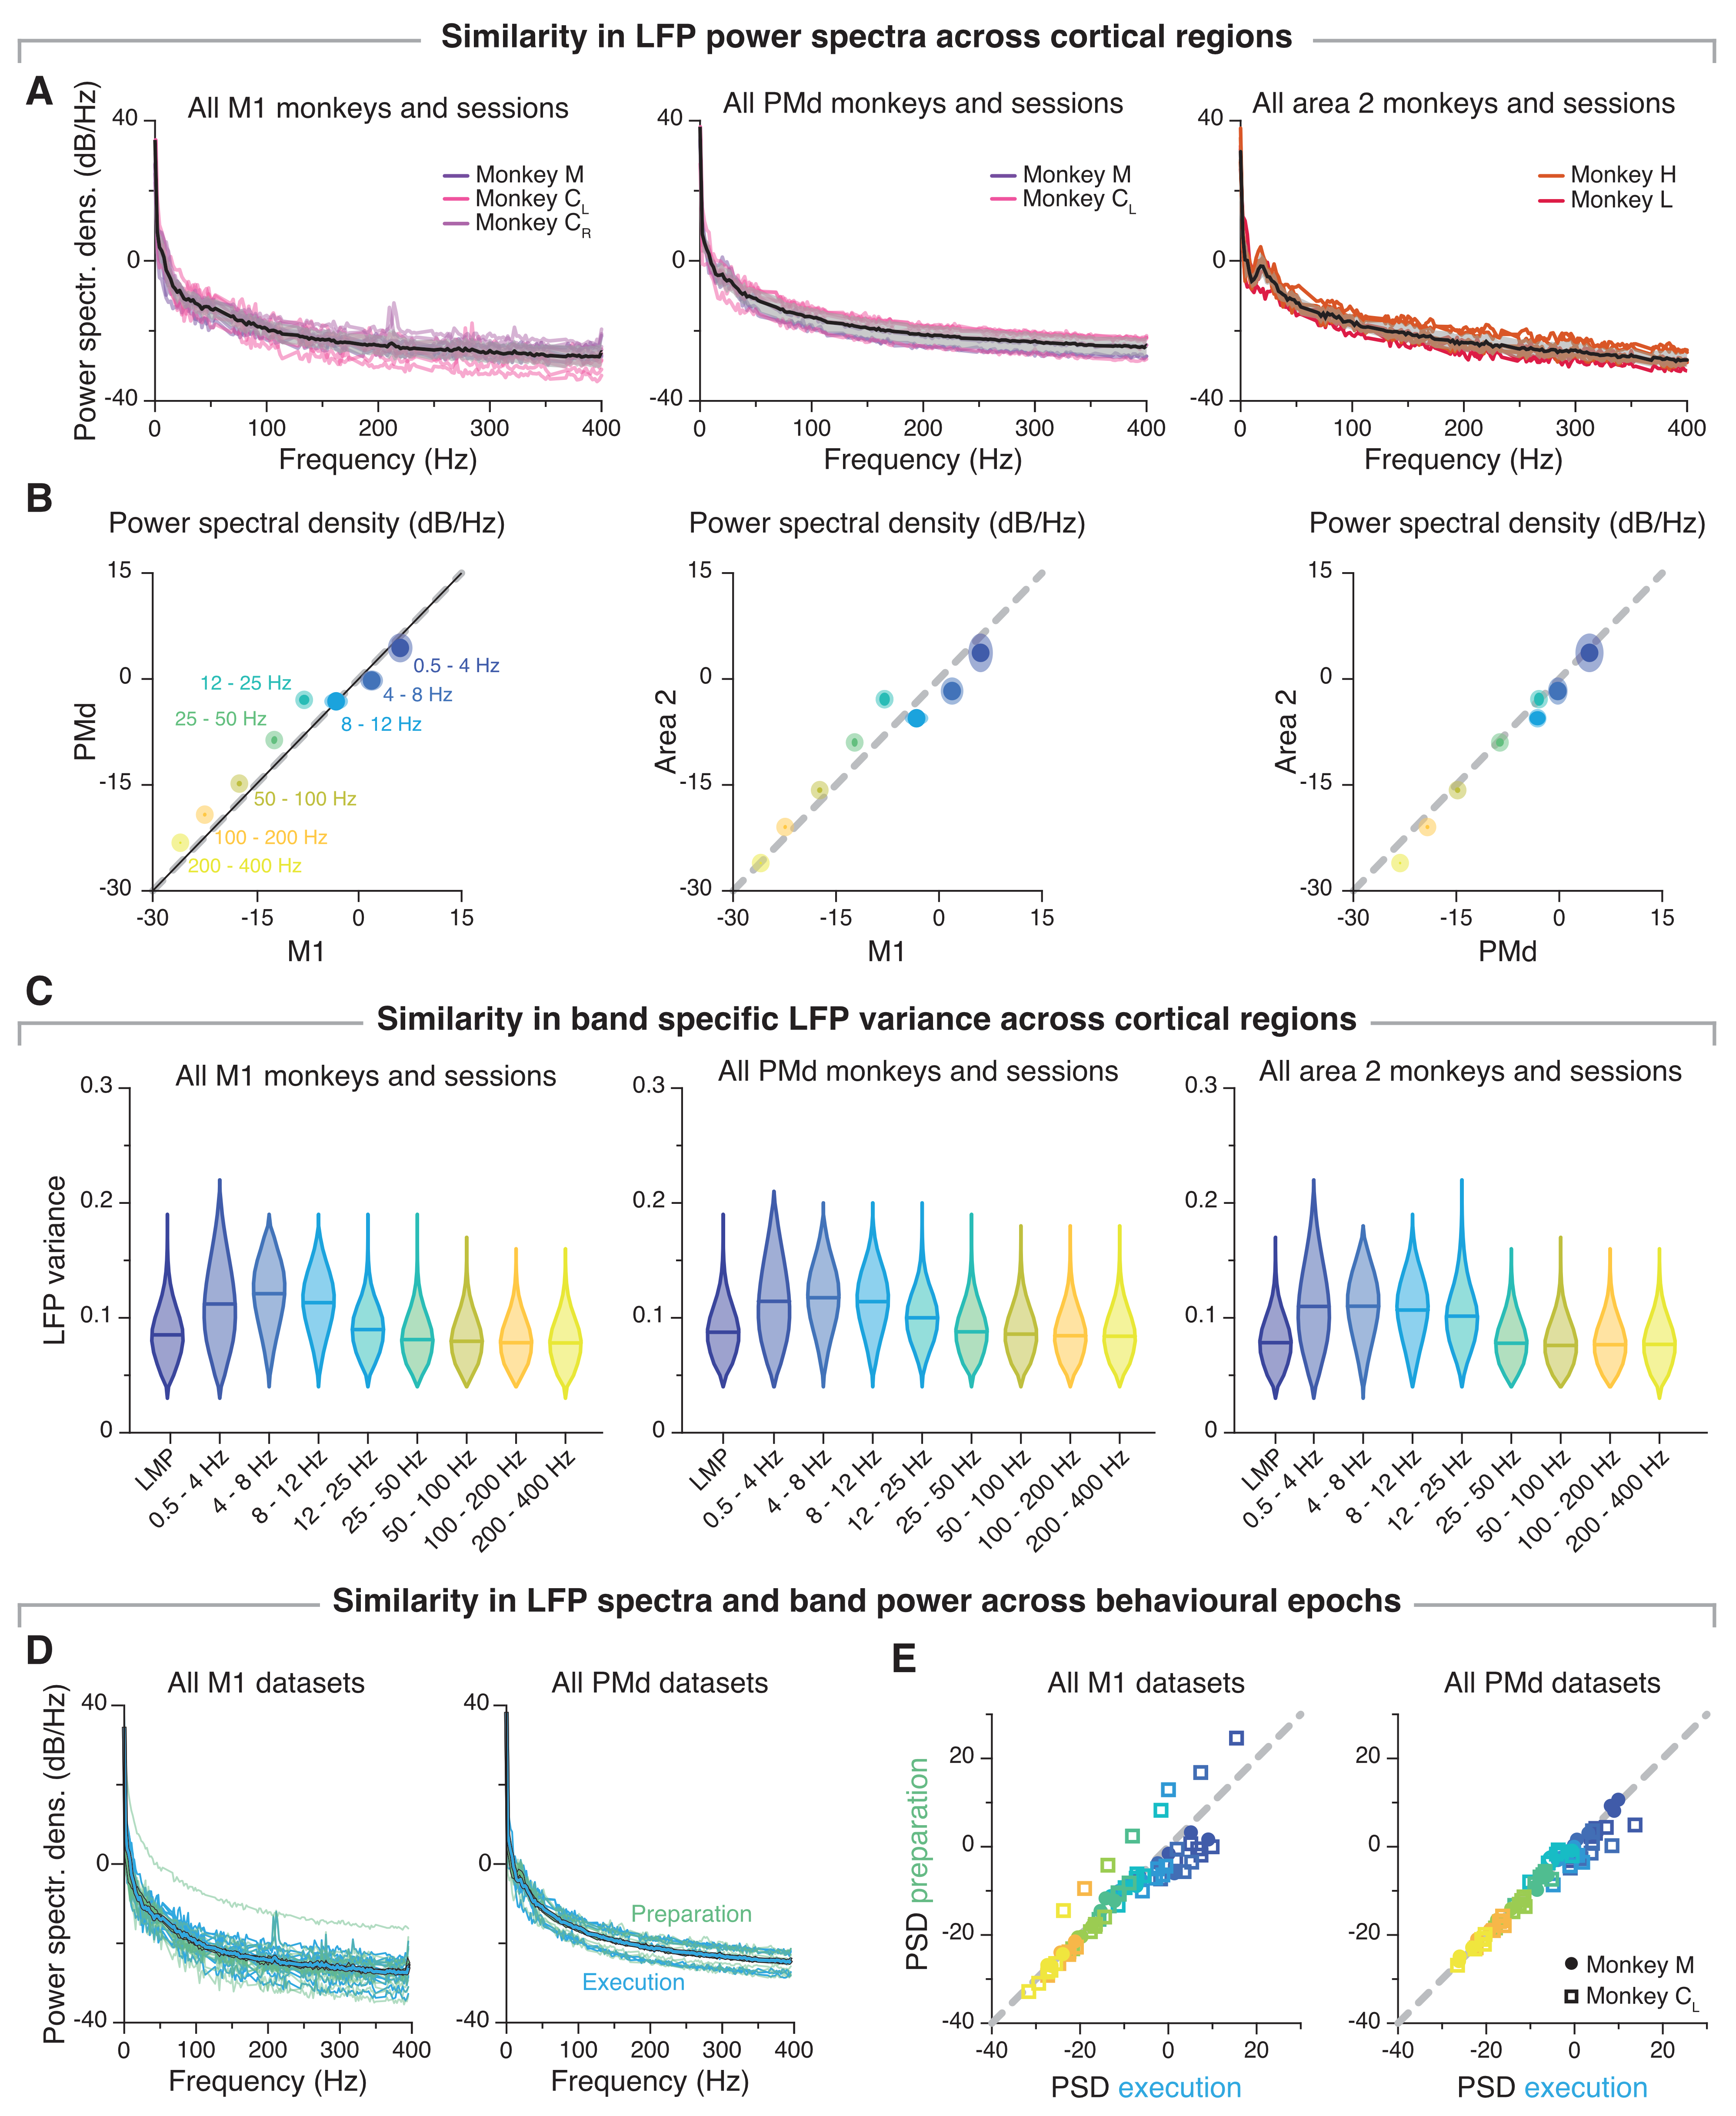

Supplement: supp [file elife-73155-supp-v1.zip › elife_poa_e73155_Figure_6_figure_supplement_2.tif]

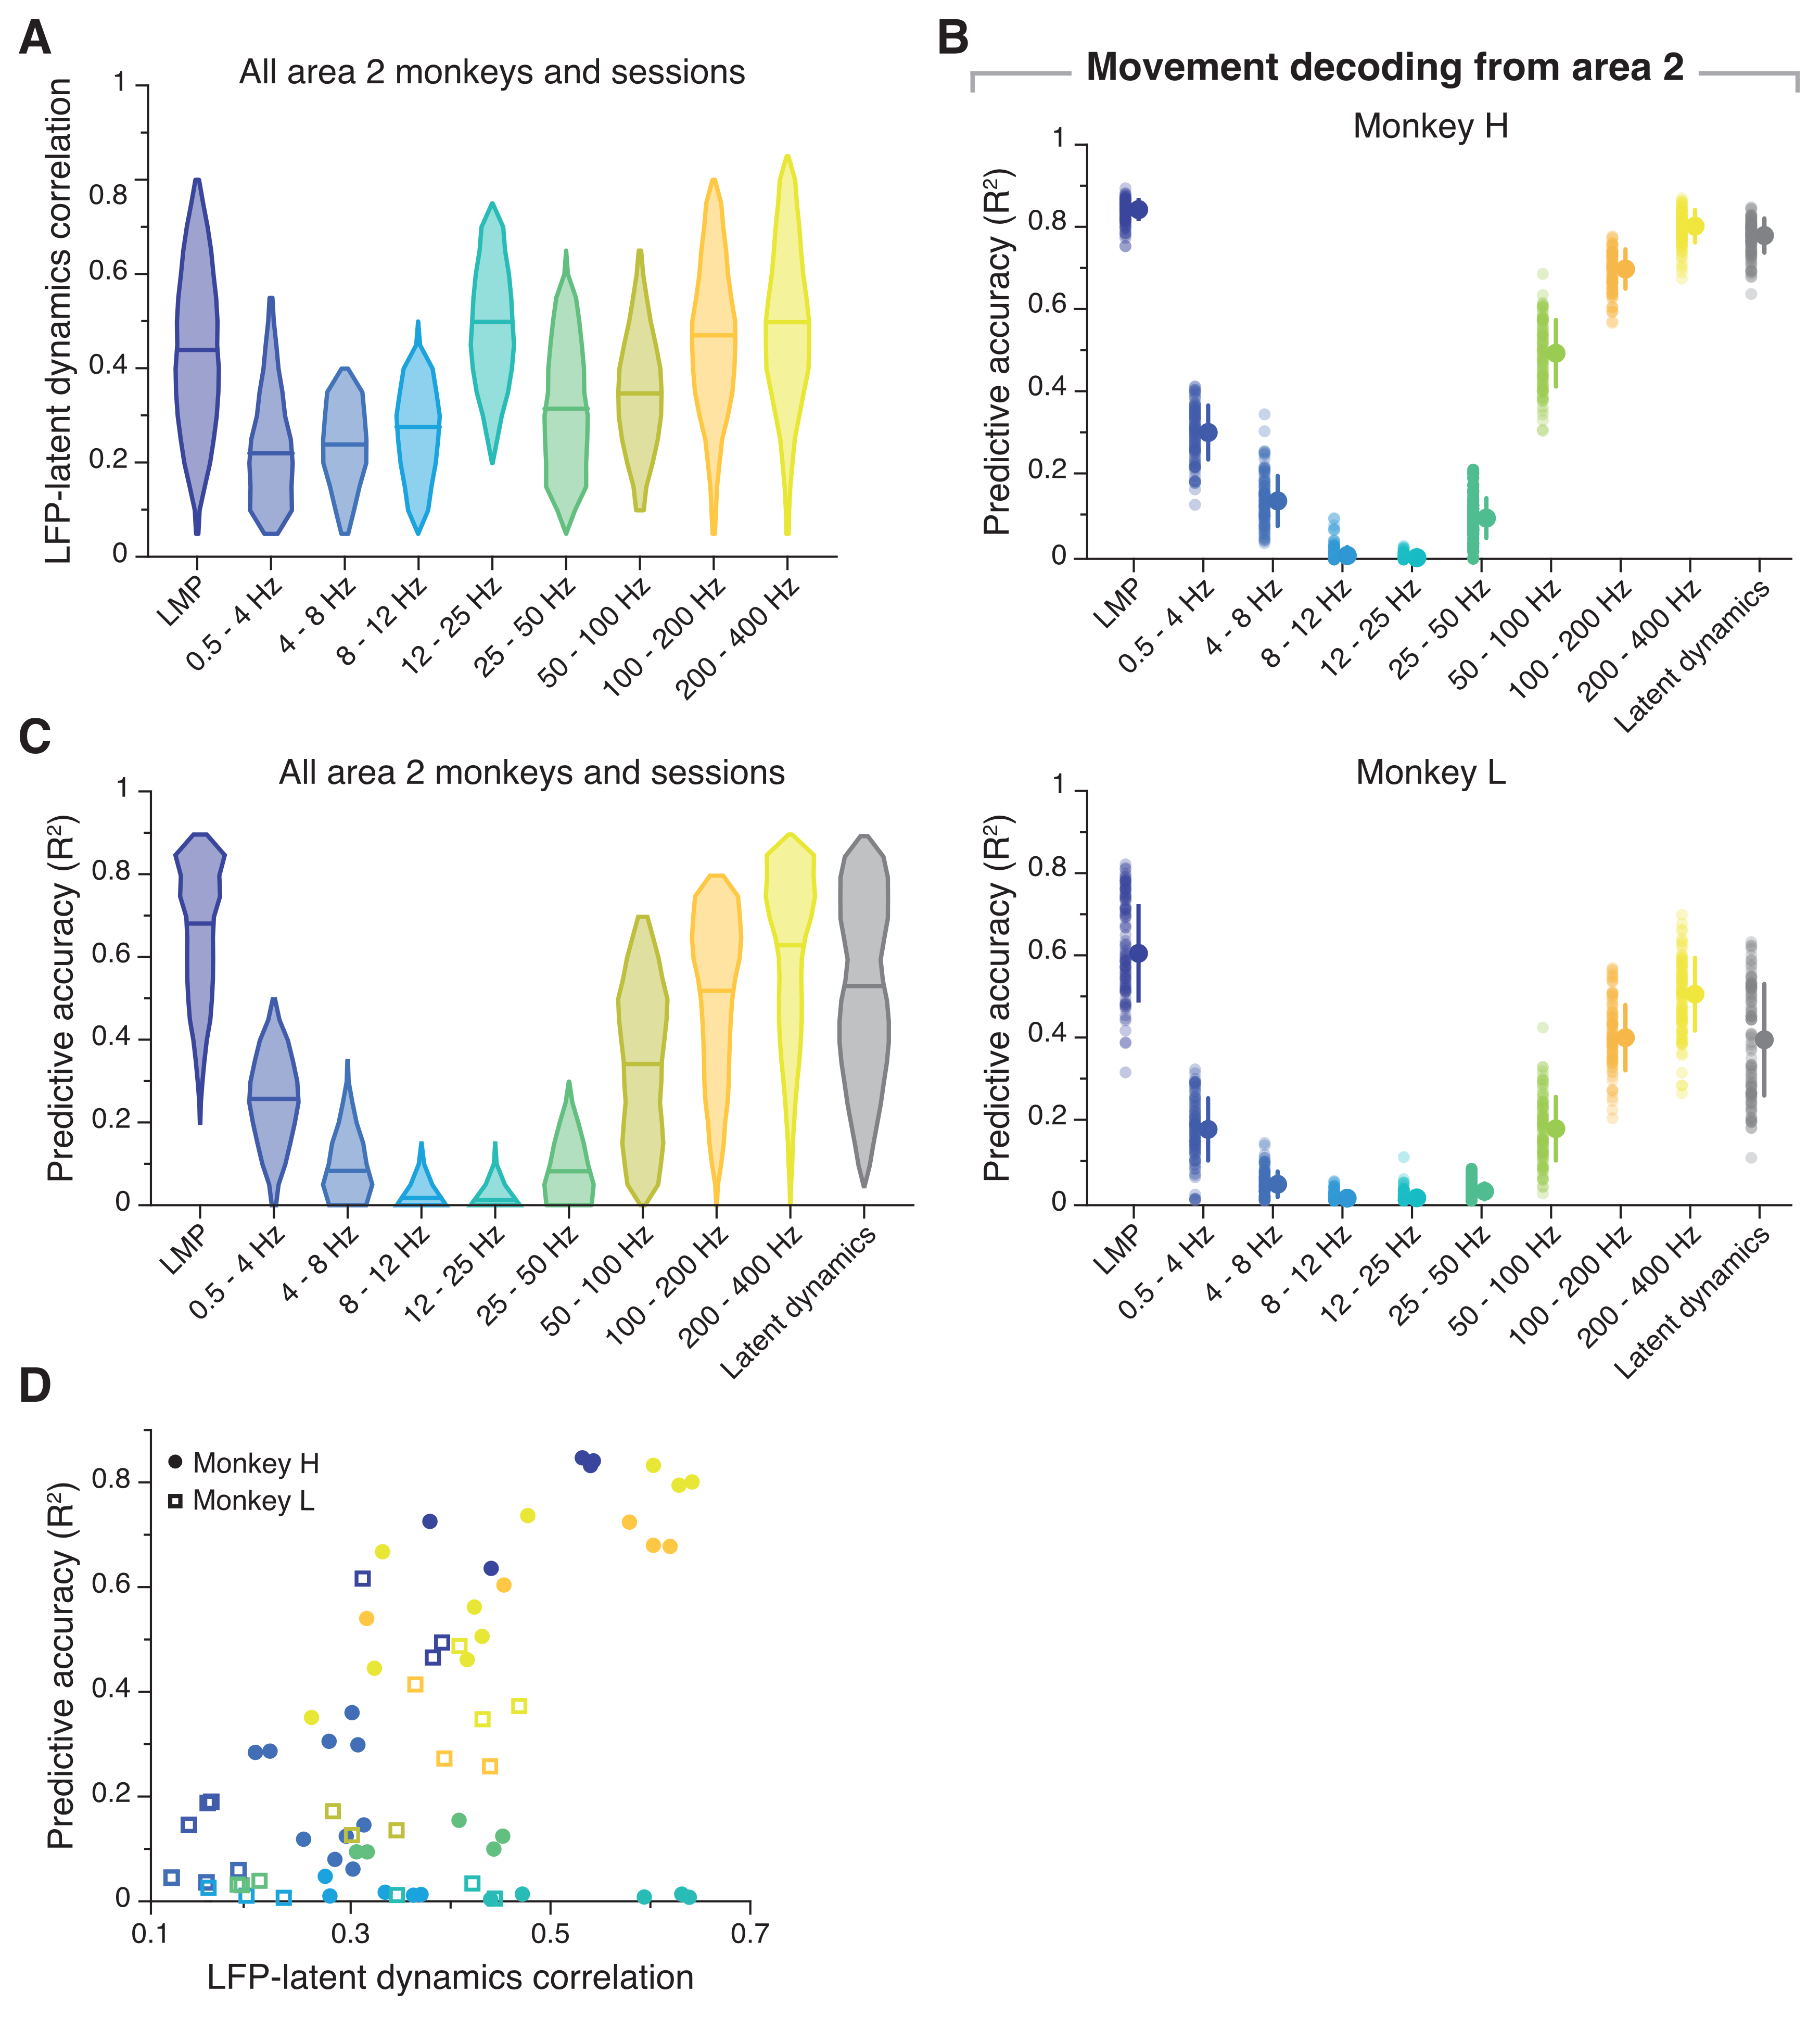

Supplement: supp [file elife-73155-supp-v1.zip › elife_poa_e73155_Figure_7_figure_supplement_1.tif]

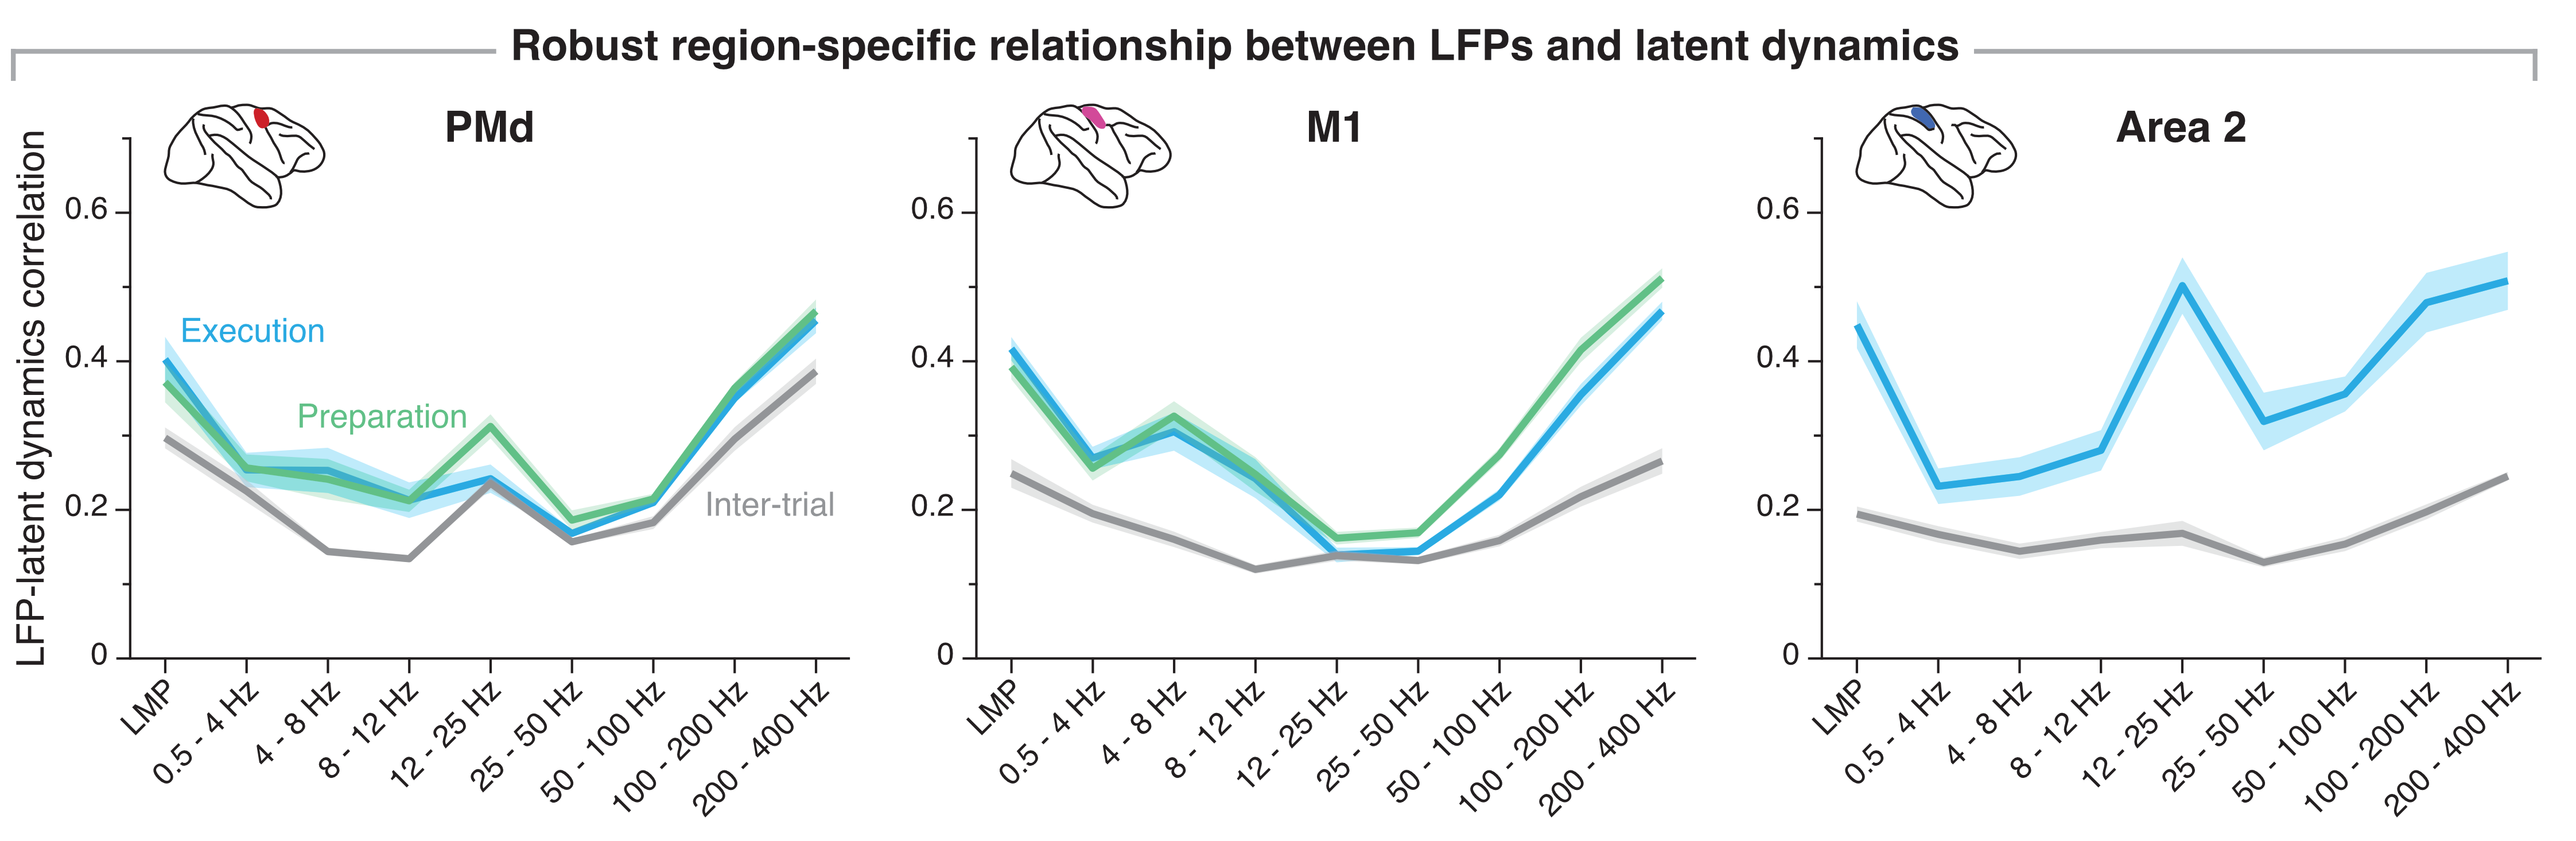

Supplement: supp [file elife-73155-supp-v1.zip › elife_poa_e73155_Figure_7_figure_supplement_2.tif]

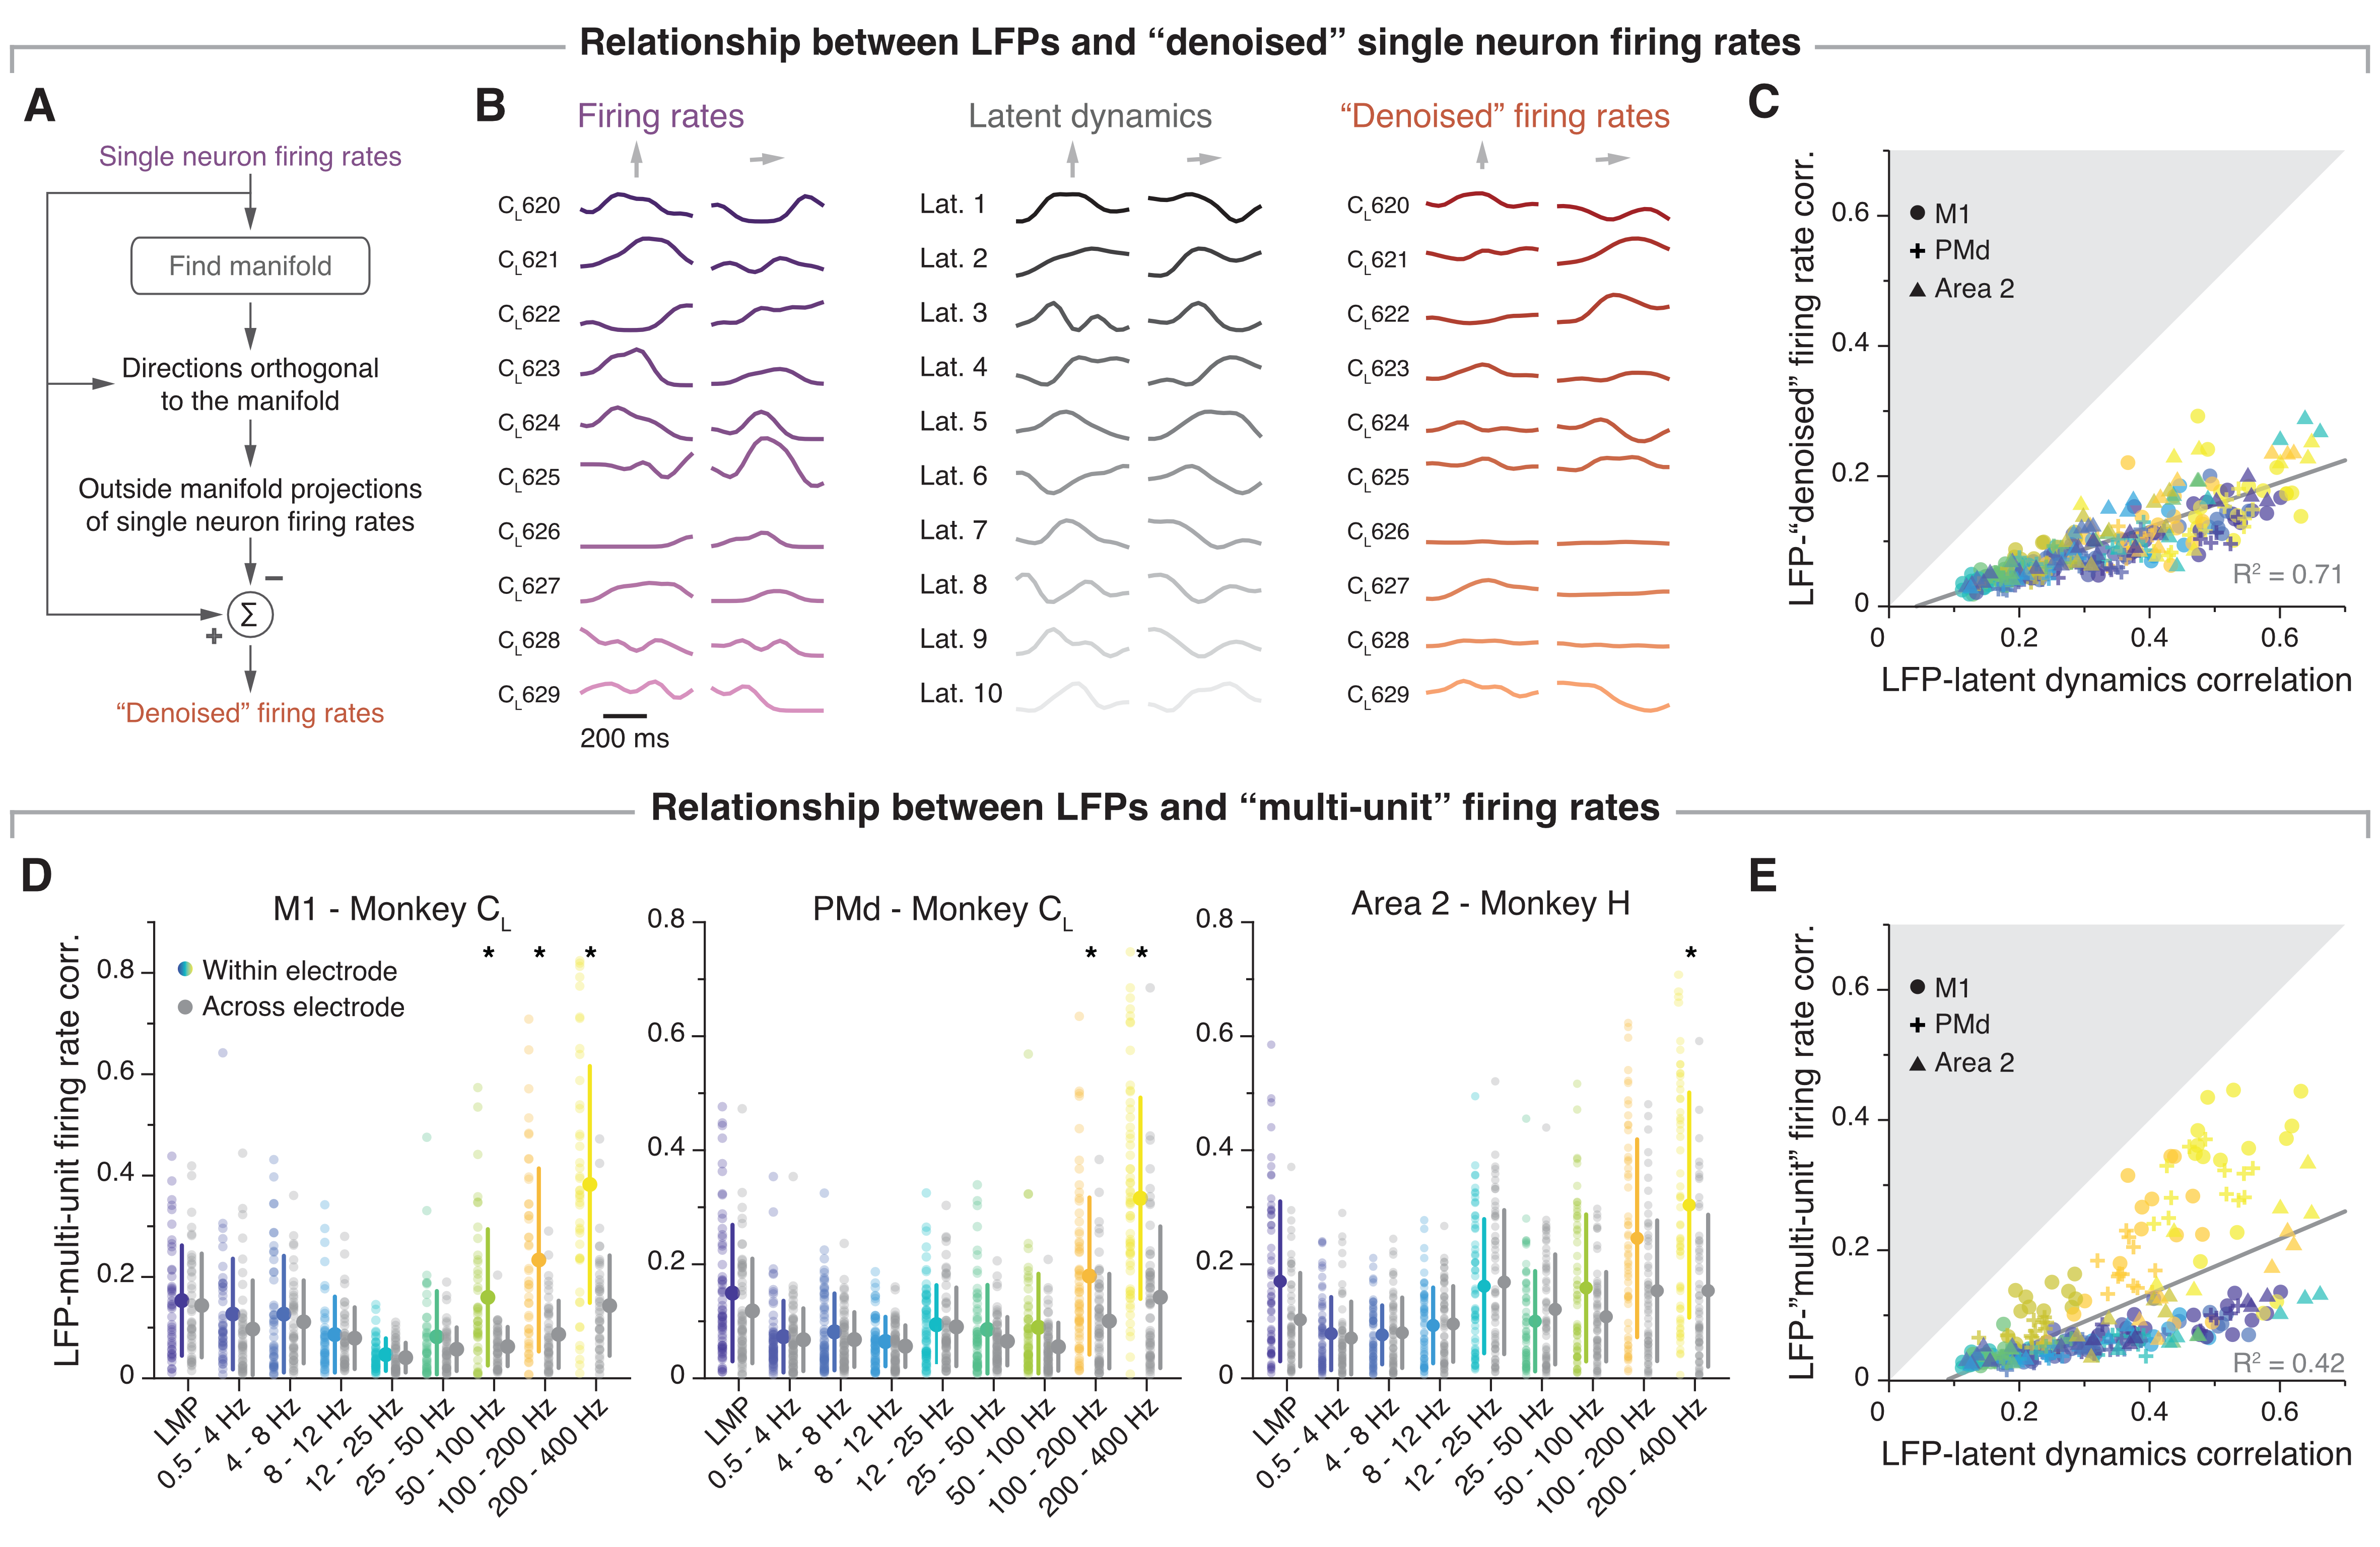

Supplement: supp [file elife-73155-supp-v1.zip › elife_poa_e73155_Figure_8_figure_supplement_1.tif]
